# Supplementary material
Source: ML conference proceedings conference paper supplement (https://openreview.net/forum?id=anqloMQdWtP)
Supplement: supplementary_material [file attachment]

1. For all authors...
  - (a) Do the main claims made in the abstract and introduction accurately reflect the paper's contributions and scope? [\[Yes\]](#)
  - (b) Did you describe the limitations of your work? [\[Yes\]](#)
  - (c) Did you discuss any potential negative societal impacts of your work? [\[N/A\]](#) There are no societal impact as this is a purely theoretical work.
  - (d) Have you read the ethics review guidelines and ensured that your paper conforms to them? [\[Yes\]](#)
2. If you are including theoretical results...
  - (a) Did you state the full set of assumptions of all theoretical results? [\[Yes\]](#)
  - (b) Did you include complete proofs of all theoretical results? [\[Yes\]](#)
3. If you ran experiments...
  - (a) Did you include the code, data, and instructions needed to reproduce the main experimental results (either in the supplemental material or as a URL)? [\[Yes\]](#)
  - (b) Did you specify all the training details (e.g., data splits, hyperparameters, how they were chosen)? [\[Yes\]](#)
  - (c) Did you report error bars (e.g., with respect to the random seed after running experiments multiple times)? [\[Yes\]](#)
  - (d) Did you include the total amount of compute and the type of resources used (e.g., type of GPUs, internal cluster, or cloud provider)? [\[Yes\]](#)
4. If you are using existing assets (e.g., code, data, models) or curating/releasing new assets...
  - (a) If your work uses existing assets, did you cite the creators? [\[N/A\]](#)
  - (b) Did you mention the license of the assets? [\[N/A\]](#)
  - (c) Did you include any new assets either in the supplemental material or as a URL? [\[N/A\]](#)
  - (d) Did you discuss whether and how consent was obtained from people whose data you're using/curating? [\[N/A\]](#)
  - (e) Did you discuss whether the data you are using/curating contains personally identifiable information or offensive content? [\[N/A\]](#)
5. If you used crowdsourcing or conducted research with human subjects...
  - (a) Did you include the full text of instructions given to participants and screenshots, if applicable? [\[N/A\]](#)
  - (b) Did you describe any potential participant risks, with links to Institutional Review Board (IRB) approvals, if applicable? [\[N/A\]](#)
  - (c) Did you include the estimated hourly wage paid to participants and the total amount spent on participant compensation? [\[N/A\]](#)

## A Further Experimental Results and Details

**Run-time specification.** The experiments in the main text and in the appendix were run on a normal PC laptop with Processor Intel(R) Core(TM) i7-8650U CPU @ 1.90GHz, 2112 Mhz, 4 Core(s), 8 Logical Processor(s), 16GB RAM. It took around 1.5 hours to run all the experiments.

### A.1 Break-down Point

As expected, we do verify that as the sub-sample size becomes  $m = O(n)$ , where the estimate is both not stable and also does not optimize over hypothesis spaces with small critical radius or that satisfy the Donsker property, then the estimate without cross-fitting breaks down, while the estimate with cross-fitting maintains a decent performance, despite the high-variance of the nuisance estimate.

|                 |      | bias  | std   | std_est | cov95 |
|-----------------|------|-------|-------|---------|-------|
| $n=50, n_x=1$   | cv=1 | 0.500 | 0.000 | 0.000   | 0.000 |
|                 | cv=2 | 0.010 | 0.200 | 0.135   | 0.805 |
| $n=50, n_x=2$   | cv=1 | 0.500 | 0.000 | 0.000   | 0.000 |
|                 | cv=2 | 0.017 | 0.204 | 0.138   | 0.795 |
| $n=100, n_x=1$  | cv=1 | 0.500 | 0.000 | 0.000   | 0.000 |
|                 | cv=2 | 0.003 | 0.148 | 0.097   | 0.794 |
| $n=100, n_x=2$  | cv=1 | 0.500 | 0.000 | 0.000   | 0.000 |
|                 | cv=2 | 0.008 | 0.146 | 0.098   | 0.797 |
| $n=500, n_x=1$  | cv=1 | 0.500 | 0.000 | 0.000   | 0.000 |
|                 | cv=2 | 0.002 | 0.066 | 0.045   | 0.798 |
| $n=500, n_x=2$  | cv=1 | 0.500 | 0.000 | 0.000   | 0.000 |
|                 | cv=2 | 0.002 | 0.064 | 0.045   | 0.838 |
| $n=1000, n_x=1$ | cv=1 | 0.500 | 0.000 | 0.000   | 0.000 |
|                 | cv=2 | 0.000 | 0.046 | 0.031   | 0.817 |
| $n=1000, n_x=2$ | cv=1 | 0.500 | 0.000 | 0.000   | 0.000 |
|                 | cv=2 | 0.001 | 0.045 | 0.032   | 0.829 |

(a) Sub-sampled 1-NN with  $m = n$

Figure 2: Comparison of bias, variance and coverage properties, with (cv=2) and without (cv=1) cross-fitting (sample splitting), for the estimation of the treatment effect in the partially linear model, when a sub-sampled 1-NN estimation is used for the nuisance function estimation.  $n$  is the number of samples and  $n_x$  the number of controls.

### A.2 Random Forest Experiments

|                  |      | bias  | std   | std_est | cov95 |                  |      | bias  | std   | std_est | cov95 |
|------------------|------|-------|-------|---------|-------|------------------|------|-------|-------|---------|-------|
| $n=50, n_x=5$    | cv=1 | 0.102 | 0.149 | 0.144   | 0.873 | $n=50, n_x=5$    | cv=1 | 0.022 | 0.176 | 0.148   | 0.896 |
|                  | cv=2 | 0.103 | 0.165 | 0.143   | 0.836 |                  | cv=2 | 0.011 | 0.191 | 0.144   | 0.845 |
| $n=50, n_x=10$   | cv=1 | 0.098 | 0.136 | 0.134   | 0.861 | $n=50, n_x=10$   | cv=1 | 0.026 | 0.167 | 0.145   | 0.904 |
|                  | cv=2 | 0.099 | 0.148 | 0.133   | 0.846 |                  | cv=2 | 0.002 | 0.180 | 0.140   | 0.869 |
| $n=100, n_x=5$   | cv=1 | 0.066 | 0.102 | 0.101   | 0.894 | $n=100, n_x=5$   | cv=1 | 0.016 | 0.116 | 0.103   | 0.909 |
|                  | cv=2 | 0.064 | 0.109 | 0.101   | 0.877 |                  | cv=2 | 0.013 | 0.125 | 0.101   | 0.877 |
| $n=100, n_x=10$  | cv=1 | 0.074 | 0.099 | 0.097   | 0.873 | $n=100, n_x=10$  | cv=1 | 0.018 | 0.114 | 0.103   | 0.908 |
|                  | cv=2 | 0.072 | 0.106 | 0.097   | 0.846 |                  | cv=2 | 0.016 | 0.128 | 0.100   | 0.870 |
| $n=500, n_x=5$   | cv=1 | 0.020 | 0.044 | 0.045   | 0.930 | $n=500, n_x=5$   | cv=1 | 0.012 | 0.050 | 0.046   | 0.908 |
|                  | cv=2 | 0.021 | 0.046 | 0.045   | 0.919 |                  | cv=2 | 0.008 | 0.053 | 0.045   | 0.900 |
| $n=500, n_x=10$  | cv=1 | 0.027 | 0.045 | 0.044   | 0.908 | $n=500, n_x=10$  | cv=1 | 0.013 | 0.048 | 0.046   | 0.923 |
|                  | cv=2 | 0.026 | 0.046 | 0.044   | 0.896 |                  | cv=2 | 0.011 | 0.051 | 0.045   | 0.911 |
| $n=1000, n_x=5$  | cv=1 | 0.012 | 0.031 | 0.032   | 0.923 | $n=1000, n_x=5$  | cv=1 | 0.010 | 0.035 | 0.033   | 0.924 |
|                  | cv=2 | 0.013 | 0.032 | 0.032   | 0.925 |                  | cv=2 | 0.006 | 0.036 | 0.032   | 0.912 |
| $n=1000, n_x=10$ | cv=1 | 0.015 | 0.033 | 0.032   | 0.910 | $n=1000, n_x=10$ | cv=1 | 0.012 | 0.035 | 0.033   | 0.909 |
|                  | cv=2 | 0.016 | 0.034 | 0.032   | 0.896 |                  | cv=2 | 0.008 | 0.038 | 0.032   | 0.893 |

(a) Sub-sampled Random Forest with  $m = n^{0.49}$

(b) Sub-sampled Random Forest with  $m = n^{10/11}$

Figure 3: Comparison of bias, variance and coverage properties, with (cv=2) and without (cv=1) cross-fitting (sample splitting), for the estimation of the treatment effect in the partially linear model, when a sub-sampled Random Forest estimation is used for the nuisance function estimation.  $n$  is the number of samples and  $n_x$  the number of controls.

### A.3 Quantile-Quantile Plots

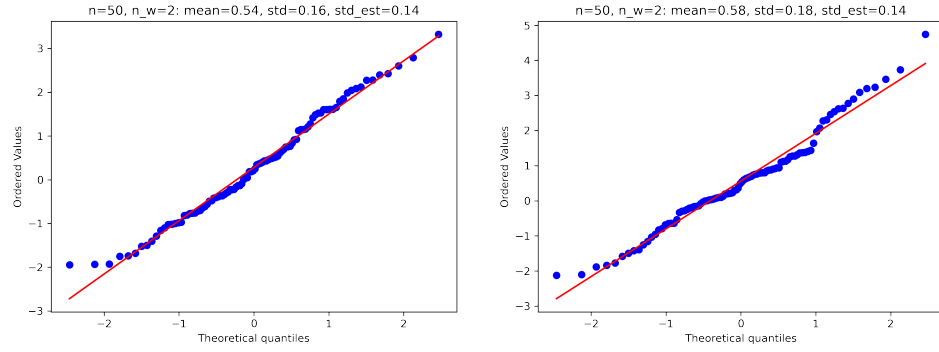

Figure 4: Quantile-Quantile (Q-Q) plots for sub-sampled 1-NN, with (right) and without (left) cross-fitting.

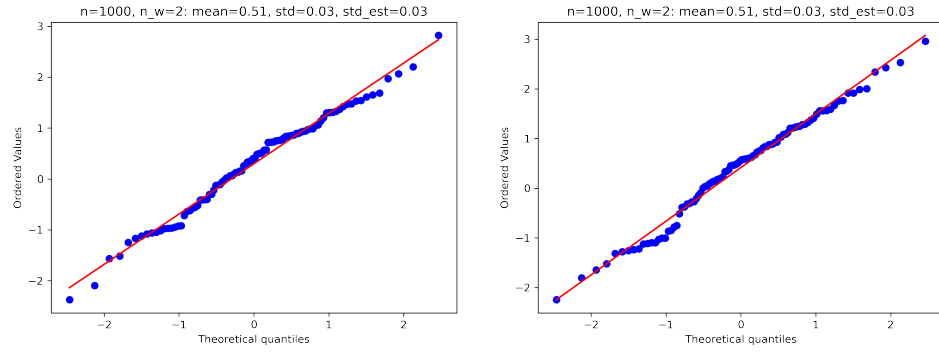

Figure 5: Quantile-Quantile (Q-Q) plots for sub-sampled 1-NN, with (right) and without (left) cross-fitting.

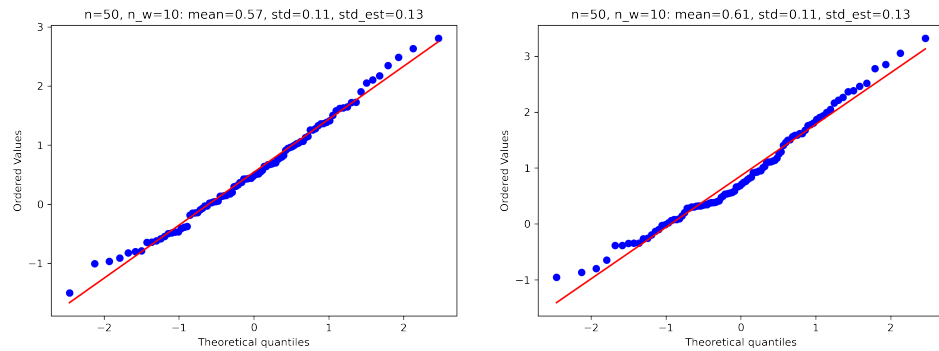

Figure 6: Quantile-Quantile (Q-Q) plots for sub-sampled Random Forest, with (right) and without (left) cross-fitting.

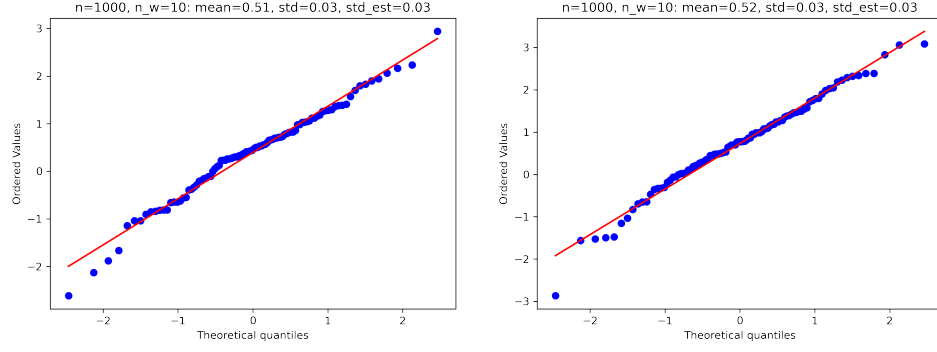

Figure 7: Quantile-Quantile (Q-Q) plots for sub-sampled Random Forest, with (right) and without (left) cross-fitting.

## B Proof of Theorem 1

*Proof.* For any  $g \in \mathcal{G}$ , by the linearity of the moment with respect to  $\theta$ :

$$\begin{aligned} A(g) (\hat{\theta} - \theta_0) &= M(\hat{\theta}, g) - M(\theta_0, g) \\ &= M(\hat{\theta}, g) - M_n(\hat{\theta}, g) + M(\theta_0, g_0) - M(\theta_0, g) + M_n(\hat{\theta}, g). \end{aligned}$$

Moreover, for any  $g$ , with  $\|g - g_0\|_2 = o_p(1)$ :

$$\begin{aligned} A(g) (\hat{\theta} - \theta_0) &= A(g_0) (\hat{\theta} - \theta_0) + (A(g) - A(g_0)) (\hat{\theta} - \theta_0) \\ &= A(g_0) (\hat{\theta} - \theta_0) + O(\|g - g_0\|_2 \|\hat{\theta} - \theta_0\|_2) \\ &= A(g_0) (\hat{\theta} - \theta_0) + o_p(\|\hat{\theta} - \theta_0\|_2). \end{aligned}$$

Thus for any  $g$ , with  $\|g - g_0\|_2 = o_p(1)$ :

$$A(g_0) (\hat{\theta} - \theta_0) = M(\hat{\theta}, g) - M_n(\hat{\theta}, g) + M(\theta_0, g_0) - M(\theta_0, g) + M_n(\hat{\theta}, g) + o_p(\|\hat{\theta} - \theta_0\|_2).$$

Let  $G_n(\theta, g) := M(\theta, g) - M_n(\theta, g)$ , then we have:

$$A(g_0) (\hat{\theta} - \theta_0) = G_n(\hat{\theta}, g) + M(\theta_0, g_0) - M(\theta_0, g) + M_n(\hat{\theta}, g) + o_p(\|\hat{\theta} - \theta_0\|_2).$$

Applying the above for  $g = \hat{g}$  and by the definition of  $\hat{\theta}$ , we have:

$$\begin{aligned} A(g_0) (\hat{\theta} - \theta_0) &= G_n(\hat{\theta}, \hat{g}) + M(\theta_0, g_0) - M(\theta_0, \hat{g}) + M_n(\hat{\theta}, \hat{g}) + o_p(\|\hat{\theta} - \theta_0\|_2) \\ &= G_n(\hat{\theta}, \hat{g}) + M(\theta_0, g_0) - M(\theta_0, \hat{g}) + o_p(n^{-1/2} + \|\hat{\theta} - \theta_0\|_2). \end{aligned}$$

Applying Neyman orthogonality and bounded second derivative of the moment with respect to  $g$ :

$$M(\theta_0, g_0) - M(\theta_0, g) = D_g M(\theta_0, g_0)[g_0 - g] + O(\|g - g_0\|_2^2) = O(\|g - g_0\|_2^2) = o_p(n^{-1/2}).$$

Thus we have that:

$$A(g_0) (\hat{\theta} - \theta_0) = G_n(\hat{\theta}, \hat{g}) + o_p(n^{-1/2} + \|\hat{\theta} - \theta_0\|_2).$$

Now we decompose the empirical process part into an asymptotically normal component and asymptotically equicontinuous parts that converge to zero in probability:

$$G_n(\hat{\theta}, \hat{g}) = G_n(\theta_0, g_0) + (G_n(\hat{\theta}, \hat{g}) - G_n(\theta_0, \hat{g})) + (G_n(\theta_0, \hat{g}) - G_n(\theta_0, g_0)).$$

By the linearity of the moment, the middle term can be written as:

$$G_n(\hat{\theta}, \hat{g}) - G_n(\theta_0, \hat{g}) = (A(\hat{g}) - A_n(\hat{g}))' (\hat{\theta} - \theta_0).$$

Note that by a triangle inequality:

$$\|A(\hat{g}) - A_n(\hat{g})\|_{op} \leq \|A(g_0) - A_n(g_0)\|_{op} + \|A(\hat{g}) - A(g_0) - (A_n(\hat{g}) - A_n(g_0))\|_{op}$$

Note that the first quantity is a simple centered empirical process and hence assuming that  $a_{i,j}(Z; g_0)$  has bounded variance, by classical results in empirical process theory we have that:

$$\|A(g_0) - A_n(g_0)\|_{op} = o_p(1)$$

Moreover, by our stochastic equicontinuity condition we have that:

$$\|A(\hat{g}) - A(g_0) - (A_n(\hat{g}) - A_n(g_0))\|_{op} = o_p(n^{-1/2}) = o_p(1).$$

Thus we get that  $\|A(\hat{g}) - A_n(\hat{g})\|_{op} = o_p(1)$ , and therefore:

$$G_n(\hat{\theta}, \hat{g}) - G_n(\theta_0, \hat{g}) = o_p(\|\hat{\theta} - \theta_0\|_2).$$

Moreover, since by our stochastic equicontinuity conditions:

$$\sqrt{n} \|A(\hat{g}) - A(g_0) - (A_n(\hat{g}) - A_n(g_0))\|_{op} = o_p(1)$$

$$\sqrt{n} \|V(\hat{g}) - V(g_0) - (V_n(\hat{g}) - V_n(g_0))\|_2 = o_p(1)$$

we have by triangle inequality, the definition of the operator norm, and the fact that  $\|\theta_0\|_2 = O(1)$  that:

$$\begin{aligned} \|G_n(\theta_0, \hat{g}) - G_n(\theta_0, g_0)\|_2 &\leq \|A(\hat{g}) - A(g_0) - (A_n(\hat{g}) - A_n(g_0))\|_{op} \|\theta_0\|_2 \\ &\quad + \|V(\hat{g}) - V(g_0) - (V_n(\hat{g}) - V_n(g_0))\|_2 \\ &= o_p(n^{-1/2}). \end{aligned}$$

Thus we can conclude that:

$$A(g_0) (\hat{\theta} - \theta_0) = G_n(\theta_0, g_0) + o_p(n^{-1/2} + \|\hat{\theta} - \theta_0\|_2).$$

Assuming that the inverse  $A(g_0)^{-1}$  exists, we can re-arrange to:

$$\hat{\theta} - \theta_0 = A(g_0)^{-1} G_n(\theta_0, g_0) + o_p(n^{-1/2} + \|\hat{\theta} - \theta_0\|_2).$$

Since  $G_n(\theta_0, g_0)$  is a mean-zero empirical process, we have that  $\|G_n(\theta_0, g_0)\|_2 = O_p(n^{-1/2})$ . Thus the above equation implies that  $\|\hat{\theta} - \theta_0\|_2 = O_p(n^{-1/2})$ . Thus we get:

$$\hat{\theta} - \theta_0 = A(g_0)^{-1} G_n(\theta_0, g_0) + o_p(n^{-1/2})$$

or equivalently that:

$$\sqrt{n} (\hat{\theta} - \theta_0) = \sqrt{n} A(g_0)^{-1} G_n(\theta_0, g_0) + o_p(1).$$

The first term converges in distribution to the claimed normal limit by invoking the Central Limit Theorem. Thus the theorem follows by Slutsky's theorem.  $\square$

## C Proof of Lemma 3

*Proof.* Before diving into the proof, recall that  $c(Z_{1:n}, x) = \arg \min_{i \leq n} |X_i - x|$ , and define:

$$\begin{aligned} c_1^* &:= c(Z_{1:n}, \frac{1}{2}), \\ c_2^* &:= \begin{cases} \arg \min_{i \leq n \text{ s.t. } X_i \leq \frac{1}{2}} |\frac{1}{2} - X_i| & \text{if } X_{c_1^*} > \frac{1}{2}, \\ \arg \min_{i \leq n \text{ s.t. } X_i > \frac{1}{2}} |\frac{1}{2} - X_i| & \text{if } X_{c_1^*} \leq \frac{1}{2}. \end{cases} \end{aligned}$$

That is, we let  $c_1^*$  be the index of the nearest example in  $\{X_1, \dots, X_n\}$  to  $\frac{1}{2}$ , and let  $c_2^*$  be the index of the nearest example to  $\frac{1}{2}$  on the other side of  $\frac{1}{2}$  from.

A new observation  $Z = (X, Y)$ , where  $X \sim \text{unif}[0, 1]$  and  $Y = \mathbb{I}(X \leq 0.5)$ , will be misclassified if  $Y_{c(Z_{1:n}, X)}$  is different from  $Y$ . Therefore it is mislabeled if it falls in the following set:

$$\mathcal{E}(X_{c_1^*}, X_{c_2^*}) := \begin{cases} \left[\frac{1}{2}, \frac{1}{2}(X_{c_1^*} + X_{c_2^*})\right] & \text{if } X_{c_1^*} \leq \frac{1}{2}, \\ \left[\frac{1}{2}(X_{c_1^*} + X_{c_2^*}), \frac{1}{2}\right] & \text{otherwise.} \end{cases}$$

For a given pair of random variables  $X_{i_1}, X_{i_2}$ , we write:

$$\lambda_{X_{i_1}, i_2} := n\mathbb{P}(X \in \mathcal{E}(X_{i_1}, X_{i_2}) \mid X_{i_1}, X_{i_2}).$$

We note  $B_1 := \{i \leq n \mid X_i \leq 1/2\}$ .

Now we remark that if  $X_{c_1^*} \leq 0.5$  then  $\left|1 - \left[X_{c_1^*} + X_{c_2^*}\right]\right| = X_{c_1^*} + X_{c_2^*} - 1$  and

$$X_{c_2^*} - (1 - X_{c_1^*}) \mid X_{c_1^*} \sim \min_{i \in [n] \setminus B_1} U_i(X_{c_1^*})$$

where  $U_i(X_{c_1^*}) \mid X_{c_1^*} \sim_{i.i.d} \text{unif}[0, X_{c_1^*}]$ . Here  $\sim$  means "has the same distribution as."

Therefore we have

$$\begin{aligned} \mathbb{P}\left(X_{c_1^*} + X_{c_2^*} - 1 \leq \frac{2t}{n} \mid X_{c_1^*} \leq 0.5, X_{c_1^*}\right) &= \mathbb{P}\left(\min_{i \in [n] \setminus B_1} U_i(X_{c_1^*}) \leq \frac{2t}{n} \mid X_{c_1^*} \leq 0.5, X_{c_1^*}\right) \\ &= 1 - \left(1 - \frac{2t}{nX_{c_1^*}}\right)^{n-|B_1|}, \end{aligned}$$

where  $|B_1|$  denotes the cardinality of set  $B_1$ .

Therefore as  $X_{c_1^*} \rightarrow 0.5$  and  $|B_1| \rightarrow n/2$  we have

$$P\left(X_{c_1^*} + X_{c_2^*} - 1 \leq \frac{2t}{n} \mid X_{c_1^*} \leq 0.5, X_{c_1^*}\right) \rightarrow 1 - e^{-2t}.$$

Similarly we remark that if  $X_{c_1^*} > 0.5$  then  $\left|1 - \left[X_{c_1^*} + X_{c_2^*}\right]\right| = 1 - X_{c_1^*} - X_{c_2^*}$  and

$$1 - X_{c_1^*} - X_{c_2^*} \mid X_{c_1^*} \sim \min_{i \in B_1} U_i^{bis}(X_{c_1^*})$$

where  $U_i^{bis}(X_{c_1^*}) \mid X_{c_1^*} \sim_{i.i.d} \text{unif}[0, 1 - X_{c_1^*}]$ .

Therefore we have

$$\begin{aligned} \mathbb{P}\left(1 - X_{c_1^*} - X_{c_2^*} \leq \frac{2t}{n} \mid X_{c_1^*} > 0.5, X_{c_1^*}\right) &= \mathbb{P}\left(\min_{i \in B_1} U_i^{bis}(X_{c_1^*}) \leq \frac{2t}{n} \mid X_{c_1^*} > 0.5, X_{c_1^*}\right) \\ &= 1 - \left(1 - \frac{2t}{n(1 - X_{c_1^*})}\right)^{|B_1|}. \end{aligned}$$

Therefore as  $X_{c_1^*} \rightarrow 0.5$  and  $|B_1| \rightarrow n/2$  we have

$$P\left(1 - X_{c_1^*} - X_{c_2^*} \leq \frac{2t}{n} \mid X_{c_1^*} > 0.5, X_{c_1^*}\right) \rightarrow 1 - e^{-2t}.$$

This directly implies that

$$\lambda_{X_{c_1^*}, c_2^*} = \frac{n}{2} \left|1 - \left[X_{c_1^*} + X_{c_2^*}\right]\right| \xrightarrow{d} \text{Exp}(2),$$

where  $\text{Exp}(2)$  denotes an exponential distribution with rate parameter 2.

Moreover, we now also show that the expectation  $\mathbb{E}[\lambda_{X_{c_1^*}, c_2^*}] = O(1)$ .

As a first step, we note that we can write

$$\begin{aligned}\mathbb{E} \left[ \lambda_{X_{c_1^*, c_2^*}} \right] &= n\mathbb{P} \left( X \in \mathcal{E} \left( X_{c_1^*}, X_{c_2^*} \right) \right) \\ &\leq n\mathbb{P} \left( X \in \mathcal{E} \left( X_{c_1^*}, X_{c_2^*} \right), \left| \frac{|B_1|}{n} - \frac{1}{2} \right| \leq \frac{1}{4} \right) + n\mathbb{P} \left( \left| \frac{|B_1|}{n} - \frac{1}{2} \right| > \frac{1}{4} \right).\end{aligned}$$

By Azuma's concentration inequality, we know that

$$n\mathbb{P} \left( \left| \frac{|B_1|}{n} - \frac{1}{2} \right| > \frac{1}{4} \right) \leq 2ne^{-\frac{32}{n}} \rightarrow 0 \text{ as } n \rightarrow \infty.$$

To treat the other term in the sum, we have that

$$\begin{aligned}&n\mathbb{P} \left( X \in \mathcal{E} \left( X_{c_1^*}, X_{c_2^*} \right), \left| \frac{|B_1|}{n} - \frac{1}{2} \right| \leq \frac{1}{4} \right) \\ &= n\mathbb{E} \left[ \mathbb{P} \left( X \in \mathcal{E} \left( X_{c_1^*}, X_{c_2^*} \right), \left| \frac{|B_1|}{n} - \frac{1}{2} \right| \leq \frac{1}{4} \middle| X_{1:n} \right) \right] \\ &= n\mathbb{E} \left[ \mathbb{P} \left( X \in \mathcal{E} \left( X_{c_1^*}, X_{c_2^*} \right) \middle| X_{1:n} \right) \mathbb{I} \left( \left| \frac{|B_1|}{n} - \frac{1}{2} \right| \leq \frac{1}{4} \right) \right] \\ &= n\mathbb{E} \left[ \left| \mathcal{E} \left( X_{c_1^*}, X_{c_2^*} \right) \right| \mathbb{I} \left( \left| \frac{|B_1|}{n} - \frac{1}{2} \right| \leq \frac{1}{4} \right) \right]\end{aligned}$$

where  $X_{1:n} := (X_1, \dots, X_n)$  and  $\left| \mathcal{E} \left( X_{c_1^*}, X_{c_2^*} \right) \right|$  denotes the length of the interval  $\mathcal{E} \left( X_{c_1^*}, X_{c_2^*} \right)$ .

Now by triangle inequality

$$\begin{aligned}&n\mathbb{E} \left[ \left| \mathcal{E} \left( X_{c_1^*}, X_{c_2^*} \right) \right| \mathbb{I} \left( \left| \frac{|B_1|}{n} - \frac{1}{2} \right| \leq \frac{1}{4} \right) \right] \\ &= n\mathbb{E} \left[ \frac{1}{2} \left| 1 - (X_{c_1^*} + X_{c_2^*}) \right| \mathbb{I} \left( \left| \frac{|B_1|}{n} - \frac{1}{2} \right| \leq \frac{1}{4} \right) \right] \\ &\leq \frac{n}{2} \mathbb{E} \left[ \left| \frac{1}{2} - X_{c_1^*} \right| \mathbb{I} \left( \left| \frac{|B_1|}{n} - \frac{1}{2} \right| \leq \frac{1}{4} \right) \right] + \frac{n}{2} \mathbb{E} \left[ \left| \frac{1}{2} - X_{c_2^*} \right| \mathbb{I} \left( \left| \frac{|B_1|}{n} - \frac{1}{2} \right| \leq \frac{1}{4} \right) \right] \\ &= \frac{n}{2} \mathbb{E} \left[ \min_{i \in B_1} U_i \cdot \mathbb{I} \left( \left| \frac{|B_1|}{n} - \frac{1}{2} \right| \leq \frac{1}{4} \right) \right] + \frac{n}{2} \mathbb{E} \left[ \min_{i \in [n] \setminus B_1} U_i \cdot \mathbb{I} \left( \left| \frac{|B_1|}{n} - \frac{1}{2} \right| \leq \frac{1}{4} \right) \right] \\ &= n\mathbb{E} \left[ \min_{i \in B_1} U_i \cdot \mathbb{I} \left( \left| \frac{|B_1|}{n} - \frac{1}{2} \right| \leq \frac{1}{4} \right) \right] \\ &\leq n\mathbb{E} \left[ \min_{i \in B_1} U_i \cdot \mathbb{I} \left( |B_1| \geq \frac{n}{4} \right) \right].\end{aligned}$$

where  $U_i := \left| \frac{1}{2} - X_i \right| \sim_{\text{i.i.d.}} \text{unif}[0, 0.5]$ , and the penultimate line follows from symmetry.

We can express the expectation in terms of integrals of tail probabilities as

$$\begin{aligned}&n\mathbb{E} \left[ \min_{i \in B_1} U_i \cdot \mathbb{I} \left( |B_1| \geq \frac{n}{4} \right) \right] = n\mathbb{E} \left[ \mathbb{E} \left[ \min_{i \in B_1} U_i \cdot \mathbb{I} \left( |B_1| \geq \frac{n}{4} \right) \middle| |B_1| \right] \right] \\ &= n\mathbb{E} \left[ \int_0^\infty \mathbb{P} \left( \min_{i \in B_1} U_i \cdot \mathbb{I} \left( |B_1| \geq \frac{n}{4} \right) \geq t \middle| |B_1| \right) dt \right] \\ &= n\mathbb{E} \left[ \frac{1}{|B_1|} \int_0^\infty \mathbb{P} \left( \min_{i \in B_1} U_i \cdot \mathbb{I} \left( |B_1| \geq \frac{n}{4} \right) \geq \frac{t}{|B_1|} \middle| |B_1| \right) dt \right].\end{aligned}$$

Here

$$\begin{aligned}&\mathbb{P} \left( \min_{i \in B_1} U_i \cdot \mathbb{I} \left( |B_1| \geq \frac{n}{4} \right) \geq \frac{t}{|B_1|} \middle| |B_1| \right) \\ &= \left( 1 - \frac{2t}{|B_1|} \right)^{|B_1|} \cdot \mathbb{I} \left( |B_1| \geq \frac{n}{4} \right) \leq e^{-2t} \cdot \mathbb{I} \left( |B_1| \geq \frac{n}{4} \right)\end{aligned}$$

where we have used the inequality that  $1 - x \leq e^{-x}$  for all  $x$ .

Hence, we have

$$\begin{aligned} & n\mathbb{E} \left[ \frac{1}{|B_1|} \int_0^\infty \mathbb{P} \left( \min_{i \in B_1} U_i \cdot \mathbb{I} \left( |B_1| \geq \frac{n}{4} \right) \geq \frac{t}{|B_1|} \mid |B_1| \right) dt \right] \\ & \leq n\mathbb{E} \left[ \frac{1}{|B_1|} \int_0^\infty e^{-2t} \cdot \mathbb{I} \left( |B_1| \geq \frac{n}{4} \right) dt \right] = \frac{n}{2} \mathbb{E} \left[ \frac{1}{|B_1|} \cdot \mathbb{I} \left( |B_1| \geq \frac{n}{4} \right) \right] \\ & \leq \frac{n}{2} \mathbb{E} \left[ \frac{4}{n} \cdot \mathbb{I} \left( |B_1| \geq \frac{n}{4} \right) \right] = 2\mathbb{P} \left( |B_1| \geq \frac{n}{4} \right) \leq 2. \end{aligned}$$

Altogether, we have shown that

$$\mathbb{E} \left[ \lambda_{X_{c_1^*}, c_2^*} \right] = O(1). \quad (2)$$

The key point is to note that

$$\begin{aligned} \|\hat{g}(Z_{1:n})(Z)\|_2^2 &= n^{1/3} \mathbb{P}(Y \neq Y_{c(Z_{1:n}, X)}) \\ &\leq n^{1/3} \mathbb{P}(X \in \mathcal{E}(X_{c_1^*}, X_{c_2^*})) \xrightarrow{(a)} 0. \end{aligned}$$

where (a) comes from realizing that

$$\mathbb{P}(X \in \mathcal{E}(X_{c_1^*}, X_{c_2^*})) = \frac{1}{n} \mathbb{E} \left[ \lambda_{X_{c_1^*}, c_2^*} \right].$$

Therefore we proved the first point. Moreover if we denote

$$\begin{aligned} c_1^{*(-1)} &:= c(Z_{1:n}^{(-1)}, \frac{1}{2}), \\ c_2^{*(-1)} &:= \begin{cases} \arg \min_{i \leq n \text{ s.t. } X_i^{(-1)} \leq \frac{1}{2}} |\frac{1}{2} - X_i^{(-1)}| & \text{if } X_{c_1^{*(-1)}}^{(-1)} > \frac{1}{2}, \\ \arg \min_{i \leq n \text{ s.t. } X_i^{(-1)} > \frac{1}{2}} |\frac{1}{2} - X_i^{(-1)}| & \text{if } X_{c_1^{*(-1)}}^{(-1)} \leq \frac{1}{2} \end{cases}, \end{aligned}$$

where  $Z_{1:n}^{(-1)}$  is  $Z_{1:n}$  with the first observation replaced with an independent copy  $\tilde{Z}_1 = (\tilde{X}_1, \tilde{Y}_1)$ , then we remark that

$$\begin{aligned} & \mathbb{P}(c_1^{*(-1)} \neq c_1^* \text{ or } c_2^{*(-1)} \neq c_2^*) \\ & \leq \mathbb{P}(c_1^{*(-1)} \neq c_1^*) + \mathbb{P}(c_2^{*(-1)} \neq c_2^*) \\ & \leq \mathbb{P}(1 = c_1^*) + \mathbb{P}(1 = c_1^{*(-1)}) + \mathbb{P}(1 = c_2^*) + \mathbb{P}(1 = c_2^{*(-1)}) \stackrel{(b)}{\leq} \frac{4}{n} \end{aligned}$$

where (b) comes from symmetry (each observation has an equal chance of being  $c_1^*$ , for example). Moreover we note that if neither  $c_1^{*(-1)} \neq c_1^*$  nor  $c_2^{*(-1)} \neq c_2^*$  then we have  $\mathcal{E}(X_{c_1^{*(-1)}}^{(-1)}, X_{c_2^{*(-1)}}^{(-1)}) = \mathcal{E}(X_{c_1^*}, X_{c_2^*})$ .

Now for ease of notation denote

$$X_{c_1^*, c_2^*} := (X_{c_1^*}, X_{c_2^*}),$$

$$X_{c_1^{*(-1)}, c_2^{*(-1)}} := \left( X_{c_1^{*(-1)}}^{(-1)}, X_{c_2^{*(-1)}}^{(-1)} \right),$$

$$X_{c_1^*, c_2^*, c_1^{*(-1)}, c_2^{*(-1)}} := \left( X_{c_1^*}, X_{c_2^*}, X_{c_1^{*(-1)}}^{(-1)}, X_{c_2^{*(-1)}}^{(-1)} \right),$$

and

$$\mathcal{E}(X_{c_1^*, c_2^*, c_1^{*(-1)}, c_2^{*(-1)}}) := \mathcal{E}(X_{c_1^*}, X_{c_2^*}) \triangle \mathcal{E}(X_{c_1^{*(-1)}}^{(-1)}, X_{c_2^{*(-1)}}^{(-1)}).$$



Then we have that there is  $C < \infty$  such that

$$\begin{aligned}
\|\nu(Z, \hat{g}) - \nu(Z, \hat{g}^{(-1)})\|_2 &= \sqrt{n} \sqrt{\mathbb{P}\left(X \in \mathcal{E}\left(X_{c_1^*, c_2^*, c_1^{*(-1)}, c_2^{*(-1)}}\right)\right)} \\
&= \sqrt{n \mathbb{E}\left[\mathbb{P}\left(X \in \mathcal{E}\left(X_{c_1^*, c_2^*, c_1^{*(-1)}, c_2^{*(-1)}}\right) \middle| X_{c_1^*, c_2^*, c_1^{*(-1)}, c_2^{*(-1)}}\right) \mathbb{I}\left(c_1^{*(-1)} \neq c_1^* \text{ or } c_2^{*(-1)} \neq c_2^*\right)\right]} \\
&\leq \sqrt{n \mathbb{E}\left[\left(|\mathcal{E}(X_{c_1^*, c_2^*})| + |\mathcal{E}(X_{c_1^{*(-1)}, c_2^{*(-1)}})\right| \mathbb{I}\left(c_1^{*(-1)} \neq c_1^* \text{ or } c_2^{*(-1)} \neq c_2^*\right)\right]} \\
&\leq \sqrt{2n \mathbb{E}\left[|\mathcal{E}(X_{c_1^*, c_2^*})| \mathbb{I}\left(c_1^{*(-1)} \neq c_1^* \text{ or } c_2^{*(-1)} \neq c_2^*\right)\right]} \text{ by symmetry} \\
&\leq \sqrt{2n \mathbb{E}\left[|\mathcal{E}(X_{c_1^*, c_2^*})| \left(\mathbb{I}(c_1^* = 1) + \mathbb{I}(c_1^{*(-1)} = 1) + \mathbb{I}(c_2^* = 1) + \mathbb{I}(c_2^{*(-1)} = 1)\right)\right]} \\
&\stackrel{(c)}{=} \sqrt{2n \mathbb{P}(X \in \mathcal{E}(X_{c_1^*, c_2^*})) \left(\mathbb{P}(c_1^* = 1) + \mathbb{P}(c_1^{*(-1)} = 1) + \mathbb{P}(c_2^* = 1) + \mathbb{P}(c_2^{*(-1)} = 1)\right)} \\
&= \frac{\sqrt{8}}{\sqrt{n}} \sqrt{\mathbb{E}\left[\lambda_{X_{c_1^*, c_2^*}}\right]} \stackrel{(d)}{\leq} \frac{C}{\sqrt{n}}
\end{aligned}$$

where to get (c) we exploited independence of  $(X_{c_1^*}, X_{c_2^*})$  and the events  $\{c_1^* = 1\}$ ,  $\{c_2^* = 1\}$ ,  $\{c_1^{*(-1)} = 1\}$ ,  $\{c_2^{*(-1)} = 1\}$  and where to get (d) we exploited [\(2\)](#).

Moreover we also notice that

$$\begin{aligned}
&\mathbb{P}\left(c_1^{*(-1)} \neq c_1^*\right) \\
&\geq \mathbb{P}\left(c_1^* = 1, \tilde{X}_1 \notin \left[\frac{1}{2} - \left|\frac{1}{2} - X_{c_3^*}\right|, \frac{1}{2} + \left|\frac{1}{2} - X_{c_3^*}\right|\right]\right) \\
&= \mathbb{P}(c_1^* = 1) \mathbb{P}\left(\tilde{X}_1 \notin \left[\frac{1}{2} - \left|\frac{1}{2} - X_{c_3^*}\right|, \frac{1}{2} + \left|\frac{1}{2} - X_{c_3^*}\right|\right]\right) \text{ by independence} \\
&= \frac{1}{n} \mathbb{E}\left[1 - 2 \left|\frac{1}{2} - X_{c_3^*}\right|\right] = \frac{1}{n} - \frac{2}{n} \mathbb{E}\left[\left|\frac{1}{2} - X_{c_3^*}\right|\right]
\end{aligned}$$

where  $c_3^* := \arg \min_{i \in [n] \setminus \{c_1^*\}} |X_i - \frac{1}{2}|$  is the index of the second nearest neighbor of  $\frac{1}{2}$  among  $X_{1:n}$ . Note that  $c_3^*$  is not necessarily equal to  $c_2^*$ , since the definition of  $c_2^*$  requires  $X_{c_2^*}$  to be on the other side of  $\frac{1}{2}$  from  $X_{c_1^*}$  while that of  $c_3^*$  does not.

By our knowledge of the expectation of the second order statistic among i.i.d. uniform random variables, we obtain that

$$\frac{1}{n} - \frac{2}{n} \mathbb{E}\left[\left|\frac{1}{2} - X_{c_3^*}\right|\right] = \frac{1}{n} - \frac{2}{n} \cdot \frac{1}{2} \cdot \frac{2}{n+1} = \frac{1}{n} - \frac{2}{n(n+1)}.$$

Therefore, similarly to before, we also have that there is a constant  $\tilde{c}, c > 0$  such that

$$\begin{aligned}
\|\nu(Z, \hat{g}) - \nu(Z, \hat{g}^{(-1)})\|_2 &= \sqrt{n} \sqrt{\mathbb{P}\left(X \in \mathcal{E}(X_{c_1^*}, X_{c_2^*}) \triangle \mathcal{E}\left(X_{c_1^{*(-1)}}, X_{c_2^{*(-1)}}\right)\right)} \\
&\geq \sqrt{n} \sqrt{\mathbb{P}\left(X \in \mathcal{E}(X_{c_1^*}, X_{c_2^*}) \triangle \mathcal{E}\left(X_{c_1^{*(-1)}}, X_{c_2^{*(-1)}}\right) \middle| c_1^{*(-1)} \neq c_1^*\right) \mathbb{P}\left(c_1^{*(-1)} \neq c_1^*\right)} \\
&\geq \sqrt{n} \sqrt{\mathbb{P}\left(X \in \mathcal{E}(X_{c_1^*}, X_{c_2^*}) \triangle \mathcal{E}\left(X_{c_1^{*(-1)}}, X_{c_2^{*(-1)}}\right) \middle| c_1^{*(-1)} \neq c_1^*, c_2^{*(-1)} = c_2^*\right) \mathbb{P}\left(c_1^{*(-1)} \neq c_1^*\right)} \\
&= \sqrt{n} \sqrt{\mathbb{E}\left[\frac{1}{2} \left|X_{c_1^*} - X_{c_1^{*(-1)}}\right| \middle| c_1^{*(-1)} \neq c_1^*, c_2^{*(-1)} = c_2^*\right] \mathbb{P}\left(c_1^{*(-1)} \neq c_1^*\right)} \\
&\geq \tilde{c} \sqrt{\mathbb{P}\left(c_1^{*(-1)} \neq c_1^*\right)} \geq \frac{c}{\sqrt{n}}.
\end{aligned}$$

Therefore we proved the second point. The third point follows because

$$\sqrt{n} \left[ V_n(\hat{g}) - V_n(g_0) - (V(\hat{g}) - V(g_0)) \right] = -\sqrt{n}V(\hat{g}) = -\sqrt{n}V(\hat{g}) = \lambda_{X_{c_1^*, c_2^*}} \xrightarrow{d} \text{Exp}(0.5)$$

where  $V_n(g_0) = V(g_0) = 0$  by definition, and  $V_n(\hat{g})$  since the nearest neighbor estimator evaluated at a training data point never misclassifies the point.  $\square$

## D Proof of Corollary 4

*Proof.* We note that by monotonicity of  $L^p$  norms, plugging the bound in (Algorithmic Stability) into the right hand side terms of (1) gives the stability conditions in lemma 2. Corollary 4 then immediately follows.  $\square$

## E Proof of Theorem 5

*Proof.* Denote  $Z_{1:m,(-l)}^b, b \in \{1, \dots, B\}$  as the corresponding bagged samples when the  $l$ -th data point  $Z_l$  is replaced with an independent copy  $\tilde{Z}_l$ . We have that for  $l \in [n]$  :

$$\begin{aligned} & \left\| \sup_x \|\hat{g}(x) - \hat{g}^{(-l)}(x)\|_2 \right\|_{2r} \\ &= \left\| \sup_x \left\| \frac{1}{B} \sum_{b=1}^B \left( \hat{h}(Z_{1:m}^b)(x) - \hat{h}(Z_{1:m,(-l)}^b)(x) \right) \right\|_2 \right\|_{2r} \\ &= \left\| \sup_x \left\| \frac{1}{B} \sum_{b=1}^B \left( \hat{h}(Z_{1:m}^b)(x) - \hat{h}(Z_{1:m,(-l)}^b)(x) \right) \mathbb{1}_{\{\exists t \leq m \text{ s.t. } Z_t^b = Z_l\}} \right\|_2 \right\|_{2r}. \end{aligned}$$

The last equality was because

$$\hat{h}(Z_{1:m}^b)(x) - \hat{h}(Z_{1:m,(-l)}^b)(x) \neq 0$$

only if

$$\exists t \leq m \text{ s.t. } Z_t^b = Z_l.$$

Fix any  $l \in [n]$ . To simplify notations, let

$$\nabla \hat{h}(Z^b)(x) := \hat{h}(Z_{1:m}^b)(x) - \hat{h}(Z_{1:m,(-l)}^b)(x),$$

and let  $A_b$  be the event  $\{\exists t \leq m \text{ s.t. } Z_t^b = Z_l\}$ .

Then

$$\left\| \sup_x \|\hat{g}(x) - \hat{g}^{(-l)}(x)\|_2 \right\|_{2r} = \left\| \sup_x \left\| \frac{1}{B} \sum_{b=1}^B \nabla \hat{h}(Z^b)(x) \mathbb{1}_{A_b} \right\|_2 \right\|_{2r}.$$

By triangle inequality and symmetry of distributions

$$\begin{aligned}
& \left\| \sup_x \|\hat{g}(x) - \hat{g}^{(-l)}(x)\|_2 \right\|_{2r} = \left\| \sup_x \left\| \frac{1}{B} \sum_{b=1}^B \nabla \hat{h}(Z^b)(x) \mathbb{1}_{A_b} \right\|_2 \right\|_{2r} \\
& \leq \frac{1}{B} \left\| \sum_{b=1}^B \sup_x \left\| \nabla \hat{h}(Z^b)(x) \mathbb{1}_{A_b} \right\|_2 \right\|_{2r} \\
& \leq \frac{1}{B} \left\| \sum_{b=1}^B \left\{ \sup_x \left\| \nabla \hat{h}(Z^b)(x) \mathbb{1}_{A_b} \right\|_2 - \mathbb{E} \left[ \sup_x \left\| \nabla \hat{h}(Z^b)(x) \mathbb{1}_{A_b} \right\|_2 \mid Z_1, \dots, Z_n, \tilde{Z}_l \right] \right\} \right\|_{2r} \\
& + \frac{1}{B} \sum_{b=1}^B \left\| \mathbb{E} \left[ \sup_x \left\| \nabla \hat{h}(Z^b)(x) \mathbb{1}_{A_b} \right\|_2 \mid Z_1, \dots, Z_n, \tilde{Z}_l \right] \right\|_{2r} \\
& \leq \frac{1}{B} \left\| \sum_{b=1}^B \left\{ \sup_x \left\| \nabla \hat{h}(Z^b)(x) \mathbb{1}_{A_b} \right\|_2 - \mathbb{E} \left[ \sup_x \left\| \nabla \hat{h}(Z^b)(x) \mathbb{1}_{A_b} \right\|_2 \mid Z_1, \dots, Z_n, \tilde{Z}_l \right] \right\} \right\|_{2r} \\
& + \left\| \mathbb{E} \left[ \sup_x \left\| \nabla \hat{h}(Z^1)(x) \mathbb{1}_{A_1} \right\|_2 \mid Z_1, \dots, Z_n, \tilde{Z}_l \right] \right\|_{2r}.
\end{aligned}$$

For ease of notations, denote

$$Z_{(l)} := (Z_1, \dots, Z_n, \tilde{Z}_l)$$

and denote

$$R_b := \sup_x \left\| \nabla \hat{h}(Z^b)(x) \mathbb{1}_{A_b} \right\|_2 - \mathbb{E} \left[ \sup_x \left\| \nabla \hat{h}(Z^b)(x) \mathbb{1}_{A_b} \right\|_2 \mid Z_{(l)} \right].$$

For the first term, we have by tower law that

$$\begin{aligned}
& \frac{1}{B} \left\| \sum_{b=1}^B \left\{ \sup_x \left\| \nabla \hat{h}(Z^b)(x) \mathbb{1}_{A_b} \right\|_2 - \mathbb{E} \left[ \sup_x \left\| \nabla \hat{h}(Z^b)(x) \mathbb{1}_{A_b} \right\|_2 \mid Z_{(l)} \right] \right\} \right\|_{2r} = \frac{1}{B} \left\| \sum_{b=1}^B R_b \right\|_{2r} \\
& = \frac{1}{B} \mathbb{E} \left[ \left( \sum_{b=1}^B R_b \right)^{2r} \right]^{\frac{1}{2r}} = \frac{1}{B} \mathbb{E} \left[ \mathbb{E} \left[ \left( \sum_{b=1}^B R_b \right)^{2r} \mid Z_{(l)} \right] \right]^{\frac{1}{2r}}.
\end{aligned}$$

To further simplify, we use the following lemma:

**Lemma 7** (Marcinkiewicz-Zygmund inequality). *Let  $p \geq 1$ . If  $X_1, \dots, X_n$  are i.i.d. random variables such that  $\mathbb{E}[X_1] = 0$ , then there exists a constant  $C_p$  such that*

$$\left\| \frac{1}{\sqrt{n}} \sum_{i=1}^n X_i \right\|_p \leq C_p \|X_i\|_p.$$

Since  $R_b, b \in [B]$  are i.i.d. conditional on  $Z_{(l)}$ , we then have that

$$\begin{aligned}
& \frac{1}{B} \mathbb{E} \left[ \mathbb{E} \left[ \left( \sum_{b=1}^B R_b \right)^{2r} \mid Z_{(l)} \right] \right]^{\frac{1}{2r}} \\
& \leq \frac{1}{B} \cdot \mathbb{E} \left[ \left( \sqrt{B} C_{2r} \right)^{2r} \mathbb{E} \left[ R_b^{2r} \mid Z_{(l)} \right] \right]^{1/2r} = \frac{C_{2r}}{\sqrt{B}} \cdot \|R_b\|_{2r} \text{ by tower law.}
\end{aligned}$$

Now also

$$\begin{aligned}
& \left\| \mathbb{E} \left[ \sup_x \left\| \nabla \hat{h}(Z^1)(x) \mathbb{1}_{A_1} \right\|_2 \middle| Z_1, \dots, Z_n, \tilde{Z}_l \right] \right\|_{2r} \\
&= \left\| \mathbb{P} \left( A_1 \middle| Z_1, \dots, Z_n, \tilde{Z}_l \right) \mathbb{E} \left[ \sup_x \left\| \nabla \hat{h}(Z^1)(x) \right\|_2 \middle| Z_1, \dots, Z_n, \tilde{Z}_l, A_1 \right] \right\|_{2r} \\
&\quad \text{since } \nabla \hat{h}(Z^1)(x) = 0 \text{ for all } x \text{ on } A_1^c \\
&= \left\| \mathbb{P} (A_1) \mathbb{E} \left[ \sup_x \left\| \nabla \hat{h}(Z^1)(x) \right\|_2 \middle| Z_1, \dots, Z_n, \tilde{Z}_l, A_1 \right] \right\|_{2r} \\
&\quad \text{since } A_1 \text{ is independent of } Z_1, \dots, Z_n, \tilde{Z}_l \\
&= \mathbb{P} (A_1) \left\| \mathbb{E} \left[ \sup_x \left\| \nabla \hat{h}(Z^1)(x) \right\|_2 \middle| Z_1, \dots, Z_n, \tilde{Z}_l, A_1 \right] \right\|_{2r} \\
&\leq \mathbb{P} (A_1) \left\| \sup_x \left\| \nabla \hat{h}(Z^1)(x) \right\|_2 \right\|_{2r} \quad \text{by Jensen's inequality and tower law} \\
&\leq \mathbb{P} (A_1) \cdot 2C \text{ by moment condition, since } 2r \leq s.
\end{aligned}$$

By union bound,

$$\mathbb{P} (A_1) \leq \sum_{t=1}^m \mathbb{P} (Z_t^1 = Z_l) = \frac{m}{n}.$$

Therefore, altogether we obtain

$$\begin{aligned}
& \left\| \sup_x \left\| \hat{g}(x) - \hat{g}^{(-l)}(x) \right\|_2 \right\|_{2r} \\
&\leq \frac{C_{2r}}{\sqrt{B}} \cdot \|R_b\|_{2r} + 2C \cdot \frac{m}{n} \\
&\leq \frac{C_{2r}}{\sqrt{B}} \cdot \left\| \sup_x \left\| \nabla \hat{h}(Z^1)(x) \mathbb{1}_{A_1} \right\|_2 \right\|_{2r} + \frac{C_{2r}}{\sqrt{B}} \cdot \left\| \mathbb{E} \left[ \sup_x \left\| \nabla \hat{h}(Z^b)(x) \mathbb{1}_{A_b} \right\|_2 \middle| Z_{(l)} \right] \right\|_{2r} + 2C \cdot \frac{m}{n} \\
&\leq \frac{C_{2r}}{\sqrt{B}} \cdot \left\| \sup_x \left\| \nabla \hat{h}(Z^1)(x) \mathbb{1}_{A_1} \right\|_2 \right\|_{2r} + \frac{C_{2r}}{\sqrt{B}} \cdot 2C \cdot \frac{m}{n} + 2C \cdot \frac{m}{n} \\
&\leq \frac{2C \cdot C_{2r}}{\sqrt{B}} \cdot \|\mathbb{1}_{A_1}\|_k + \frac{C_{2r}}{\sqrt{B}} \cdot 2C \cdot \frac{m}{n} + 2C \cdot \frac{m}{n} \\
&= \frac{2C \cdot C_{2r}}{\sqrt{B}} \cdot (\mathbb{P}(A_1))^{1/k} + \frac{C_{2r}}{\sqrt{B}} \cdot 2C \cdot \frac{m}{n} + 2C \cdot \frac{m}{n} \\
&\leq \frac{2C \cdot C_{2r}}{\sqrt{B}} \cdot \left( \frac{m}{n} \right)^{1/k} + \frac{C_{2r}}{\sqrt{B}} \cdot 2C \cdot \frac{m}{n} + 2C \cdot \frac{m}{n}.
\end{aligned}$$

Hence, we also have

$$\max_{l \leq n} \left\| \sup_x \left\| \hat{g}(x) - \hat{g}^{(-l)}(x) \right\|_2 \right\|_{2r} \leq \frac{2C \cdot C_{2r}}{\sqrt{B}} \cdot \left( \frac{m}{n} \right)^{1/k} + \frac{C_{2r}}{\sqrt{B}} \cdot 2C \cdot \frac{m}{n} + 2C \cdot \frac{m}{n}.$$

Assuming

$$m = o(\sqrt{n})$$

and

$$B \gg m^{2/k} \cdot n^{1-\frac{2}{k}},$$

this upper bound is of order  $o(n^{-1/2})$ :

$$\max_{l \leq n} \left\| \sup_x \left\| \hat{g}(x) - \hat{g}^{(-l)}(x) \right\|_2 \right\|_{2r} = o(n^{-1/2}).$$

□

**Remark 3.** We could in fact relax the conditions in Theorem 5 by using Rosenthal's inequality instead of Marcinkiewicz-Zygmund inequality in the proof. Moreover, we can relax the bounded moments condition to restrict on  $L^{2r}$  norm instead of on  $L^s$  norm. This gives the following theorem.

**Theorem 8.** Assume  $B, m$  satisfy

$$m = o(\sqrt{n}) \quad B \gg m^{\frac{1}{2r-1}} \cdot n^{\frac{r-1}{2r-1}},$$

and assume the base estimator  $\hat{h}$  has bounded moments:

$$\max_{l \leq n} \left\| \sup_x \left\| \hat{h}(Z_{1:m}^1)(x) \right\|_2 \right\|_{2r} \leq C$$

for some constant  $C > 0$ . Then (Algorithmic Stability) is achieved:

$$\max_{l \leq n} \left\| \sup_x \left\| \hat{g}(x) - \hat{g}^{(-l)}(x) \right\|_2 \right\|_{2r} = o(n^{-1/2}).$$

Therefore if  $a$  and  $\nu$  satisfy the condition (1) then the condition (2) is satisfied.

*Proof of Theorem 8* We follow the proof of Theorem 5 and obtain

$$\begin{aligned} \left\| \sup_x \left\| \hat{g}(x) - \hat{g}^{(-l)}(x) \right\|_2 \right\|_{2r} &= \left\| \sup_x \left\| \frac{1}{B} \sum_{b=1}^B \nabla \hat{h}(Z^b)(x) \mathbb{1}_{A_b} \right\|_2 \right\|_{2r} \\ &\leq \frac{1}{B} \left\| \sum_{b=1}^B R_b \right\|_{2r} + 2C \cdot \frac{m}{n} \\ &= \frac{1}{B} \cdot \mathbb{E} \left[ \left( \sum_{b=1}^B R_b \right)^{2r} \middle| Z_{(l)} \right]^{1/2r} + 2C \cdot \frac{m}{n} \quad \text{by tower law.} \end{aligned}$$

We then use the following lemma.

**Lemma 9** (Rosenthal's inequality). *Let  $p \geq 1$ . If  $X_1, \dots, X_n$  are i.i.d. random variables such that  $\mathbb{E}[X_1] = 0$ , then there exists a constant  $C_p$  such that*

$$\left\| \frac{1}{\sqrt{n}} \sum_{i=1}^n X_i \right\|_p \leq C_p \left( \|X_i\|_2 + n^{\frac{1}{p}-\frac{1}{2}} \|X_i\|_p \right).$$

Since  $R_b, b \in [B]$  are i.i.d. conditional on  $Z_{(l)}$ , we then have that by symmetry of distributions

$$\begin{aligned} &\frac{1}{B} \cdot \mathbb{E} \left[ \left( \sum_{b=1}^B R_b \right)^{2r} \middle| Z_{(l)} \right]^{1/2r} \\ &\leq \frac{1}{B} \cdot \mathbb{E} \left[ \left( \sqrt{B} C_{2r} \right)^{2r} \left( \left( \mathbb{E} [R_1^2 | Z_{(l)}] \right)^{1/2} + B^{\frac{1}{2r}-\frac{1}{2}} \left( \mathbb{E} [R_1^{2r} | Z_{(l)}] \right)^{1/2r} \right)^{2r} \right]^{1/2r} \\ &= \frac{C_{2r}}{\sqrt{B}} \cdot \left\| \left( \mathbb{E} [R_1^2 | Z_{(l)}] \right)^{1/2} + B^{\frac{1}{2r}-\frac{1}{2}} \left( \mathbb{E} [R_1^{2r} | Z_{(l)}] \right)^{1/2r} \right\|_{2r}. \end{aligned}$$

By triangle inequality, we have

$$\begin{aligned} &\frac{C_{2r}}{\sqrt{B}} \cdot \left\| \left( \mathbb{E} [R_1^2 | Z_{(l)}] \right)^{1/2} + B^{\frac{1}{2r}-\frac{1}{2}} \left( \mathbb{E} [R_1^{2r} | Z_{(l)}] \right)^{1/2r} \right\|_{2r} \\ &\leq \frac{C_{2r}}{\sqrt{B}} \cdot \left\| \left( \mathbb{E} [R_1^2 | Z_{(l)}] \right)^{1/2} \right\|_{2r} + \frac{C_{2r}}{\sqrt{B}} \cdot \left\| B^{\frac{1}{2r}-\frac{1}{2}} \left( \mathbb{E} [R_1^{2r} | Z_{(l)}] \right)^{1/2r} \right\|_{2r}. \end{aligned}$$

For further ease of notations let

$$R_{1,(1)} := \sup_x \left\| \nabla \hat{h}(Z^1)(x) \mathbb{1}_{A_1} \right\|_2,$$

$$R_{1,(2)} := \mathbb{E} \left[ \sup_x \left\| \nabla \hat{h}(Z^1)(x) \mathbb{1}_{A_1} \right\|_2 \middle| Z_1, \dots, Z_n, \tilde{Z}_l \right].$$

Note that

$$R_1 = R_{1,(1)} - R_{1,(2)}.$$

Then also by triangle inequality and Jensen's inequality

$$\begin{aligned} & \frac{C_{2r}}{\sqrt{B}} \cdot \left\| \left( \mathbb{E} \left[ R_1^2 \middle| Z_{(l)} \right] \right)^{1/2} \right\|_{2r} \\ & \leq \frac{C_{2r}}{\sqrt{B}} \cdot \left\| \left( \mathbb{E} \left[ R_{1,(1)}^2 \middle| Z_{(l)} \right] \right)^{1/2} \right\|_{2r} + \frac{C_{2r}}{\sqrt{B}} \cdot \left\| \left( \mathbb{E} \left[ R_{1,(2)}^2 \middle| Z_{(l)} \right] \right)^{1/2} \right\|_{2r} \\ & \leq \frac{2C_{2r}}{\sqrt{B}} \cdot \left\| \left( \mathbb{E} \left[ R_{1,(1)}^2 \middle| Z_{(l)} \right] \right)^{1/2} \right\|_{2r} \\ & = \frac{2C_{2r}}{\sqrt{B}} \cdot \left\| \left( \mathbb{E} \left[ \left( \sup_x \left\| \nabla \hat{h}(Z^1)(x) \mathbb{1}_{A_1} \right\|_2 \right)^2 \middle| Z_{(l)} \right] \right)^{1/2} \right\|_{2r} \\ & = \frac{2C_{2r}}{\sqrt{B}} \cdot \left\| \left( \mathbb{E} \left[ \sup_x \left\| \nabla \hat{h}(Z^1)(x) \right\|_2^2 \cdot \mathbb{1}_{A_1} \middle| Z_{(l)} \right] \right)^{1/2} \right\|_{2r}. \end{aligned}$$

Further, we rewrite this term as

$$\begin{aligned} & \frac{2C_{2r}}{\sqrt{B}} \cdot \left\| \left( \mathbb{E} \left[ \sup_x \left\| \nabla \hat{h}(Z^1)(x) \right\|_2^2 \cdot \mathbb{1}_{A_1} \middle| Z_{(l)} \right] \right)^{1/2} \right\|_{2r} \\ & = \frac{2C_{2r}}{\sqrt{B}} \cdot \left\| \left( \mathbb{P}(A_1) \cdot \mathbb{E} \left[ \sup_x \left\| \nabla \hat{h}(Z^1)(x) \right\|_2^2 \middle| Z_{(l)}, A_1 \right] \right)^{1/2} \right\|_{2r} \\ & \quad \text{since } \nabla \hat{h}(Z^1)(x) = 0 \text{ for all } x \text{ on } A_1^c \\ & = \frac{2C_{2r}}{\sqrt{B}} \cdot \left\| \left( \mathbb{P}(A_1) \cdot \mathbb{E} \left[ \sup_x \left\| \nabla \hat{h}(Z^1)(x) \right\|_2^2 \middle| Z_{(l)}, A_1 \right] \right)^{1/2} \right\|_{2r} \\ & \quad \text{since } A_1 \text{ is independent of } Z_{(l)} \\ & = \frac{2C_{2r}}{\sqrt{B}} \cdot (\mathbb{P}(A_1))^{1/2} \cdot \left\| \left( \mathbb{E} \left[ \sup_x \left\| \nabla \hat{h}(Z^1)(x) \right\|_2^2 \middle| Z_{(l)}, A_1 \right] \right)^{1/2} \right\|_{2r}. \end{aligned}$$

By Jensen's inequality and tower law, we have

$$\begin{aligned} & \frac{2C_{2r}}{\sqrt{B}} \cdot (\mathbb{P}(A_1))^{1/2} \cdot \left\| \left( \mathbb{E} \left[ \sup_x \left\| \nabla \hat{h}(Z^1)(x) \right\|_2^2 \middle| Z_{(l)}, A_1 \right] \right)^{1/2} \right\|_{2r} \\ & \leq \frac{2C_{2r}}{\sqrt{B}} \cdot (\mathbb{P}(A_1))^{1/2} \cdot \left\| \sup_x \left\| \nabla \hat{h}(Z^1)(x) \right\|_2 \right\|_{2r} \\ & \leq \frac{2C_{2r}}{\sqrt{B}} \cdot \left( \frac{m}{n} \right)^{1/2} \cdot 2C. \end{aligned}$$

Similarly, by replacing the powers of 2 and  $1/2$  with  $2r$  and  $1/2r$ , we can show that

$$\begin{aligned} & \frac{C_{2r}}{\sqrt{B}} \cdot \left\| B^{\frac{1}{2r}-\frac{1}{2}} \left( \mathbb{E} \left[ R_1^{2r} \middle| Z_{(l)} \right] \right)^{1/2r} \right\|_{2r} \\ & \leq 2C_{2r} \cdot B^{\frac{1}{2r}-1} \left( \frac{m}{n} \right)^{1/2r} \cdot 2C. \end{aligned}$$

Altogether, we have

$$\begin{aligned} & \max_{l \leq n} \left\| \sup_x \|\hat{g}(x) - \hat{g}^{(-l)}(x)\|_2 \right\|_{2r} = \left\| \sup_x \|\hat{g}(x) - \hat{g}^{(-l)}(x)\|_2 \right\|_{2r} \\ & \leq \frac{2C_{2r}}{\sqrt{B}} \cdot \left( \frac{m}{n} \right)^{1/2} \cdot 2C + 2C_{2r} \cdot B^{\frac{1}{2r}-1} \left( \frac{m}{n} \right)^{1/2r} \cdot 2C + 2C \cdot \frac{m}{n}. \end{aligned}$$

Assuming

$$m = o(\sqrt{n})$$

and

$$B \gg m^{\frac{1}{2r-1}} \cdot n^{\frac{r-1}{2r-1}},$$

this upper bound is of order  $o(n^{-1/2})$ :

$$\max_{l \leq n} \left\| \sup_x \|\hat{g}(x) - \hat{g}^{(-l)}(x)\|_2 \right\|_{2r} = o(n^{-1/2}).$$

□

## F Proof of Lemma 6

*Proof.* Lemma 6 follows from Theorem 3 of [35] by taking  $\psi(Z; \theta) := Y - \theta(x)$ . □

## G Establishing $L^{2r}$ - and Mean-Squared-Continuity for Examples 1, 2, and 3

Recall that

$$m(Z; \theta, g) = a(Z; g)\theta + \nu(Z; g).$$

We will establish  $L^{2r}$ -continuity and mean-squared-continuity for Examples 1, 2, and 3 in this section.

### G.1 Establishing for Example 1

For this example, we have

$$\begin{aligned} a(Z; g) &= (T - p(X))(T - p(X))' \\ \nu(Z; g) &= (Y - q(X))(T - p(X))'. \end{aligned}$$

Let  $v \geq 1$  be the constant such that  $1 = \frac{1}{r} + \frac{1}{v}$ . Denote  $T_i, i \in [p]$  as the  $i$ -th coordinate of  $T$ . Denote  $Y_i, i \in [p]$  as the  $i$ -th coordinate of  $Y$ . For any function  $p$  denote  $p_i(X), i \in [p]$  as the  $i$ -th coordinate of  $p(X)$ . We will show that subject to

$$\|T_i\|_{2v}, \|\hat{p}_i(X)\|_{2v}, \|\hat{p}_i(X_l)\|_{2v}, \|Y\|_{2v}, \|\hat{q}(X)\|_{2v}$$

being finite for all  $i \in [p]$  then  $L^{2r}$ -continuity conditions hold.

Moreover, we will show that if further

$$\|T_i\|_{\infty}, \|p_i(X)\|_{\infty}, \|p'_i(X)\|_{\infty}, \|Y\|_{\infty}, \|q'(X)\|_{\infty}$$

are finite for all  $i \in [p]$  then mean-squared-continuity conditions hold with  $q = 2$ .

We will illustrate for function  $a$  and for function  $\nu$  separately.

For function  $a$ :

We first verify  $L^{2r}$ -continuity for function  $a$ . We have that for any  $i, j \in [p]$

$$\begin{aligned} & a_{i,j}(Z; \hat{g}) - a_{i,j}(Z; \hat{g}^{(-l)}) \\ &= \left( \hat{p}_i^{(-l)}(X) - \hat{p}_i(X) \right) T_j + T_i \left( \hat{p}_j^{(-l)}(X) - \hat{p}_j(X) \right) \\ &+ \frac{1}{2} \left( \hat{p}_i^{(-l)}(X) - \hat{p}_i(X) \right) \left( \hat{p}_j^{(-l)}(X) + \hat{p}_j(X) \right) \\ &+ \frac{1}{2} \left( \hat{p}_i^{(-l)}(X) + \hat{p}_i(X) \right) \left( \hat{p}_j^{(-l)}(X) - \hat{p}_j(X) \right). \end{aligned}$$

Then by triangle inequality and Hölder's inequality, we obtain

$$\begin{aligned} & \left\| a_{i,j}(Z; \hat{g}) - a_{i,j}(Z; \hat{g}^{(-l)}) \right\|_2 \\ & \leq \left\| \sup_x \left| \hat{p}_i^{(-l)}(x) - \hat{p}_i(x) \right| \cdot |T_j| \right\|_2 + \left\| \sup_x \left| \hat{p}_j^{(-l)}(x) - \hat{p}_j(x) \right| \cdot |T_i| \right\|_2 \\ & + \frac{1}{2} \left\| \sup_x \left| \hat{p}_i^{(-l)}(x) - \hat{p}_i(x) \right| \cdot \left( \hat{p}_j^{(-l)}(X) + \hat{p}_j(X) \right) \right\|_2 \\ & + \frac{1}{2} \left\| \sup_x \left| \hat{p}_j^{(-l)}(x) - \hat{p}_j(x) \right| \cdot \left( \hat{p}_i^{(-l)}(X) + \hat{p}_i(X) \right) \right\|_2 \\ & \leq \left\| \sup_x \left| \hat{p}_i^{(-l)}(x) - \hat{p}_i(x) \right| \right\|_{2r} \cdot \|T_j\|_{2v} + \left\| \sup_x \left| \hat{p}_j^{(-l)}(x) - \hat{p}_j(x) \right| \right\|_{2r} \cdot \|T_i\|_{2v} \\ & + \frac{1}{2} \left\| \sup_x \left| \hat{p}_i^{(-l)}(x) - \hat{p}_i(x) \right| \right\|_{2r} \cdot \left\| \hat{p}_j^{(-l)}(X) + \hat{p}_j(X) \right\|_{2v} \\ & + \frac{1}{2} \left\| \sup_x \left| \hat{p}_j^{(-l)}(x) - \hat{p}_j(x) \right| \right\|_{2r} \cdot \left\| \hat{p}_i^{(-l)}(X) + \hat{p}_i(X) \right\|_{2v} \\ & \stackrel{(a)}{\leq} L_1 \cdot \left\| \sup_x \left| \hat{g}^{(-l)}(x) - \hat{g}(x) \right| \right\|_{2r} \end{aligned}$$

where

$$\begin{aligned} L_1 &:= \|T_j\|_{2v} + \|T_i\|_{2v} + \frac{1}{2} \left\| \hat{p}_i^{(-l)}(X) \right\|_{2v} + \frac{1}{2} \left\| \hat{p}_i(X) \right\|_{2v} + \frac{1}{2} \left\| \hat{p}_j^{(-l)}(X) \right\|_{2v} + \frac{1}{2} \left\| \hat{p}_j(X) \right\|_{2v} \\ &\stackrel{(b)}{=} \|T_j\|_{2v} + \|T_i\|_{2v} + \left\| \hat{p}_i(X) \right\|_{2v} + \left\| \hat{p}_j(X) \right\|_{2v}. \end{aligned}$$

Here for (a) we have used the triangle inequality, and for (b) we have used the fact that  $Z_l$  and  $\tilde{Z}_l$  have the same distribution.

By replacing  $Z$  with  $Z_l$ , we can similarly show that

$$\begin{aligned} & \left\| a_{i,j}(Z_l; \hat{g}) - a_{i,j}(Z_l; \hat{g}^{(-l)}) \right\|_2 \\ & \leq L_2 \cdot \left\| \sup_x \left| \hat{g}^{(-l)}(x) - \hat{g}(x) \right| \right\|_{2r} \end{aligned}$$

where

$$L_2 := \|T_j\|_{2v} + \|T_i\|_{2v} + \frac{1}{2} \left\| \hat{p}_i(X) \right\|_{2v} + \frac{1}{2} \left\| \hat{p}_i(X_l) \right\|_{2v} + \frac{1}{2} \left\| \hat{p}_j(X) \right\|_{2v} + \frac{1}{2} \left\| \hat{p}_j(X_l) \right\|_{2v}.$$

Hence, the  $L^{2r}$ -continuity conditions hold for function  $a$  provided that all the aforementioned  $L^{2v}$ -norm quantities are finite.

Now we check the mean-squared-continuity conditions for function  $a$ .



For any  $g, g'$ , any  $i, j \in [p]$ , we have

$$\begin{aligned} & a_{i,j}(Z; g) - a_{i,j}(Z; g') \\ &= (p'_i(X) - p_i(X)) T_j + T_i (p'_j(X) - p_j(X)) \\ &+ \frac{1}{2} (p'_i(X) - p_i(X)) (p'_j(X) + p_j(X)) \\ &+ \frac{1}{2} (p'_i(X) + p_i(X)) (p'_j(X) - p_j(X)). \end{aligned}$$

Then by triangle inequality and Hölder's inequality, we obtain

$$\begin{aligned} & \|a_{i,j}(Z; g) - a_{i,j}(Z; g')\|_2 \\ &\leq \|p'_i(X) - p_i(X)\|_2 \cdot \|T_j\|_\infty + \|p'_j(X) - p_j(X)\|_2 \cdot \|T_i\|_\infty \\ &+ \frac{1}{2} \|p'_i(X) - p_i(X)\|_2 \cdot \|p'_j(X) + p_j(X)\|_\infty + \frac{1}{2} \|p'_j(X) - p_j(X)\|_2 \cdot \|p'_i(X) + p_i(X)\|_\infty \\ &\leq L_3 \cdot \|g - g'\|_2 \end{aligned}$$

where

$$L_3 := \|T_j\|_\infty + \|T_i\|_\infty + \frac{1}{2} \|p'_j(X)\|_\infty + \frac{1}{2} \|p_j(X)\|_\infty + \frac{1}{2} \|p'_i(X)\|_\infty + \frac{1}{2} \|p_i(X)\|_\infty.$$

Provided all these  $L^\infty$ -norm quantities are finite, mean-squared-continuity conditions hold for function  $a$  with  $q = 2$ .

For function  $\nu$ :

We have

$$\begin{aligned} \nu_i(Z; \hat{g}) - \nu_i(Z; \hat{g}^{(-l)}) &= (\hat{q}^{(-l)}(X) - \hat{q}(X)) T_i + Y (\hat{p}_i^{(-l)}(X) - \hat{p}_i(X)) \\ &- (\hat{q}^{(-l)}(X) - \hat{q}(X)) \hat{p}_i(X) - \hat{q}^{(-l)}(X) (\hat{p}_i^{(-l)}(X) - \hat{p}_i(X)). \end{aligned}$$

Hence, by triangle inequality and Hölder's inequality, we similarly obtain that

$$\begin{aligned} & \left\| \nu_i(Z; \hat{g}) - \nu_i(Z; \hat{g}^{(-l)}) \right\|_2 \\ &\leq \left\| \sup_x \left| \hat{q}^{(-l)}(x) - \hat{q}(x) \right| \right\|_{2r} \cdot \{ \|T_i\|_{2v} + \|\hat{p}_i(X)\|_{2v} \} \\ &+ \left\| \sup_x \left| \hat{p}_i^{(-l)}(x) - \hat{p}_i(x) \right| \right\|_{2r} \cdot \{ \|Y\|_{2v} + \|\hat{q}^{(-l)}(X)\|_{2v} \} \\ &\leq \left\| \sup_x \left| \hat{g}^{(-l)}(x) - \hat{g}(x) \right| \right\|_{2} \left\| \right\|_{2r} \cdot \{ \|T_i\|_{2v} + \|\hat{p}_i(X)\|_{2v} + \|Y\|_{2v} + \|\hat{q}(X)\|_{2v} \}. \end{aligned}$$

By replacing  $Z$  with  $Z_l$ , we can similarly show that

$$\begin{aligned} & \left\| \nu_i(Z_l; \hat{g}) - \nu_i(Z_l; \hat{g}^{(-l)}) \right\|_2 \\ &\leq \left\| \sup_x \left| \hat{g}^{(-l)}(x) - \hat{g}(x) \right| \right\|_{2} \left\| \right\|_{2r} \cdot \{ \|T_i\|_{2v} + \|\hat{p}_i(X_l)\|_{2v} + \|Y\|_{2v} + \|\hat{q}(X)\|_{2v} \}. \end{aligned}$$

Therefore, the  $L^{2r}$ -continuity conditions hold for function  $\nu$  provided that all these  $L^{2v}$ -norm quantities are finite.

As for mean-squared-continuity, note that we have that

$$\begin{aligned} & \nu_i(Z; g) - \nu_i(Z; g') \\ &= (q'(X) - q(X)) T_i + Y (p'_i(X) - p_i(X)) \\ &- (q'(X) - q(X)) p_i(X) - q'(X) (p'_i(X) - p_i(X)). \end{aligned}$$

Hence, by triangle inequality and Hölder's inequality, we derive that

$$\begin{aligned}
& \|\nu_i(Z; g) - \nu_i(Z; g')\|_2 \\
& \leq \|q'(X) - q(X)\|_2 \cdot \|T_i\|_\infty + \|p'_i(X) - p_i(X)\|_2 \cdot \|Y\|_\infty \\
& + \|q'(X) - q(X)\|_2 \cdot \|p_i(X)\|_\infty + \|p'_i(X) - p_i(X)\|_2 \cdot \|q'(X)\|_\infty \\
& \leq \|g - g'\|_2 \cdot \{\|T_i\|_\infty + \|Y\|_\infty + \|p_i(X)\|_\infty + \|q'(X)\|_\infty\}.
\end{aligned}$$

Provided all these  $L^\infty$ -norm quantities are finite, mean-squared-continuity conditions hold for function  $\nu$  with  $q = 2$ .

## G.2 Establishing for Example 2

For this example, we have

$$\begin{aligned}
a(Z; g) &= (Z - r(X))(T - p(X))' \\
\nu(Z; g) &= (Y - q(X))(Z - r(X))'.
\end{aligned}$$

Denote  $Z_i, i \in [p]$  as the  $i$ -th coordinate of  $Z$ . Denote  $r_i(X), i \in [p]$  as the  $i$ -th coordinate of  $r(X)$ . Analogously to Example 1, replacing all functions  $p_i$  and their estimates with  $r_i$  and their corresponding estimates, replacing all  $T_i$  with  $Z_i$  in the analysis of  $a_{i,j}$  and  $\nu_i$ , we can show that subject to

$$\|T_i\|_{2v}, \|Z_i\|_{2v}, \|\hat{p}_i(X)\|_{2v}, \|\hat{p}_i(X_l)\|_{2v}, \|\hat{r}_i(X)\|_{2v}, \|\hat{r}_i(X_l)\|_{2v}, \|Y\|_{2v}, \|\hat{q}(X)\|_{2v}$$

being finite for all  $i \in [p]$  then  $L^{2r}$ -continuity conditions hold. Moreover, if further

$$\|T_i\|_\infty, \|Z_i\|_\infty, \|p_i(X)\|_\infty, \|p'_i(X)\|_\infty, \|r_i(X)\|_\infty, \|r'_i(X)\|_\infty, \|Y\|_\infty, \|q'(X)\|_\infty$$

are finite for all  $i \in [p]$  then mean-squared-continuity conditions hold with  $q = 2$ .

## G.3 Establishing for Example 3

For this example, we have

$$\begin{aligned}
a(Z; g) &\equiv 1 \\
\nu(Z; g) &= -m_b(Z; q) - \mu(T, X)(Y - q(T, X)).
\end{aligned}$$

The  $L^{2r}$ -continuity and mean-squared-continuity conditions trivially hold for function  $a$ . For function  $\nu$ , we have

$$\begin{aligned}
\nu(Z; \hat{g}) - \nu(Z; \hat{g}^{(-l)}) &= (m_b(Z; \hat{q}^{(-l)}) - m_b(Z; \hat{q})) \\
&+ \hat{\mu}^{(-l)}(T, X)(\hat{q}(T, X) - \hat{q}^{(-l)}(T, X)) - (Y - \hat{q}(T, X))(\hat{\mu}(T, X) - \hat{\mu}^{(-l)}(T, X)).
\end{aligned}$$

Hence, by triangle inequality and Hölder's inequality we obtain

$$\begin{aligned}
& \|\nu(Z; \hat{g}) - \nu(Z; \hat{g}^{(-l)})\|_2 \\
& \leq \|m_b(Z; \hat{q}^{(-l)}) - m_b(Z; \hat{q})\|_2 \\
& + \|\hat{\mu}^{(-l)}(T, X)(\hat{q}(T, X) - \hat{q}^{(-l)}(T, X))\|_2 + \|(Y - \hat{q}(T, X))(\hat{\mu}(T, X) - \hat{\mu}^{(-l)}(T, X))\|_2 \\
& \leq \|m_b(Z; \hat{q}^{(-l)}) - m_b(Z; \hat{q})\|_2 \\
& + \|\hat{\mu}^{(-l)}(T, X)\|_{2v} \cdot \|\hat{q}(T, X) - \hat{q}^{(-l)}(T, X)\|_{2r} \\
& + \|Y - \hat{q}(T, X)\|_{2v} \cdot \|\hat{\mu}(T, X) - \hat{\mu}^{(-l)}(T, X)\|_{2r} \\
& \leq \|m_b(Z; \hat{q}^{(-l)}) - m_b(Z; \hat{q})\|_2 \\
& + \|\hat{\mu}(T, X)\|_{2v} \cdot \|\sup_{t,x} |\hat{q}(t, x) - \hat{q}^{(-l)}(t, x)|\|_{2r} \\
& + (\|Y\|_{2v} + \|\hat{q}(T, X)\|_{2v}) \|\sup_{t,x} |\hat{\mu}(t, x) - \hat{\mu}^{(-l)}(t, x)|\|_{2r}.
\end{aligned}$$

Since  $m_b$  is a linear functional, there exists  $L_m > 0$  such that

$$\|m_b(Z; \hat{q}^{(-l)}) - m_b(Z; \hat{q})\|_2 \leq L_m \cdot \left\| \sup_{t,x} |\hat{q}(t, x) - \hat{q}^{(-l)}(t, x)| \right\|_{2r}.$$

Hence, we have

$$\begin{aligned} & \|\nu(Z; \hat{g}) - \nu(Z; \hat{g}^{(-l)})\|_2 \\ & \leq \left\| \sup_{t,x} |\hat{g}(t, x) - \hat{g}^{(-l)}(t, x)| \right\|_{2r} \cdot \{L_m + \|\hat{\mu}(T, X)\|_{2v} + \|Y\|_{2v} + \|\hat{q}(T, X)\|_{2v}\}. \end{aligned}$$

Analogously, by replacing  $Z$  with  $Z_l$ , we can show that

$$\begin{aligned} & \|\nu(Z_l; \hat{g}) - \nu(Z_l; \hat{g}^{(-l)})\|_2 \\ & \leq \left\| \sup_{t,x} |\hat{g}(t, x) - \hat{g}^{(-l)}(t, x)| \right\|_{2r} \cdot \left\{ \tilde{L}_m + \|\hat{\mu}(T, X)\|_{2v} + \|Y\|_{2v} + \|\hat{q}(T_l, X_l)\|_{2v} \right\} \end{aligned}$$

for some constant  $\tilde{L}_m > 0$ .

Therefore, subject to

$$L_m, \tilde{L}_m, \|\hat{\mu}(T, X)\|_{2v}, \|Y\|_{2v}, \|\hat{q}(T, X)\|_{2v}, \|\hat{q}(T_l, X_l)\|_{2v}$$

being finite for all  $i \in [p]$  then  $L^{2r}$ -continuity conditions also hold for function  $\nu$ .

Moreover, we have

$$\begin{aligned} & \|\nu(Z; g) - \nu(Z; g')\|_2 \\ & \leq \|m_b(Z; q') - m_b(Z; q)\|_2 \\ & \quad + \|\mu'(T, X)(q(T, X) - q'(T, X))\|_2 + \|(Y - q(T, X))(\mu(T, X) - \mu'(T, X))\|_2 \\ & \leq \|g - g'\|_2 \cdot \{L_b + \|\mu'(T, X)\|_\infty + \|Y\|_\infty + \|q(T, X)\|_\infty\} \end{aligned}$$

where since  $m_b$  is a linear functional, there exists  $L_b > 0$  such that

$$\|m_b(Z; q') - m_b(Z; q)\|_2 \leq L_b \cdot \|q(t, x) - q'(t, x)\|_2.$$

Provided that

$$L_b, \|\mu'(T, X)\|_\infty, \|Y\|_\infty, \|q(T, X)\|_\infty$$

are finite, mean-squared-continuity conditions hold for function  $\nu$  with  $q = 2$ .

## H Extension to Nonlinear Moments

In this section, we extend our results to the case where the moment function  $m(Z; \theta, g)$  is not necessarily linear in the target parameter  $\theta$ . For simplicity, we assume that the nuisance estimator  $\hat{g}$  is symmetric in each of the training data points  $Z_1, \dots, Z_n$ . Moreover, we will denote with  $Z$  a fresh random draw from the distribution.

We introduce some notation. We denote with  $\|\cdot\|_{2,2}$  the norm of a random vector defined as:  $\|Z\|_{2,2} = \sqrt{\mathbb{E}[\sum_i Z_i^2]}$ , which can also be thought as taking the  $L_2$  norm of each coordinate and then taking the  $\ell_2$  vector norm of this vector, or equivalently taking the  $L_2$  norm of the random variable defined as the  $\ell_2$  norm of the random vector. For clarity, for any random vector  $Z$  we will denote with  $\|Z\|_{v,2}$  the random variable that corresponds to the  $\ell_2$  vector norm of the random vector, i.e.  $\|Z\|_{v,2} = \sqrt{\sum_i Z_i^2}$ . For any random variable  $V$ , denote with  $\|V\|_2$  its  $\ell_2$  norm  $\sqrt{\mathbb{E}[V^2]}$ . Note that for any random vector  $Z$ , we have  $\|Z\|_{2,2} = \|\|Z\|_{v,2}\|_2$ .

Firstly, we establish a consistency lemma for  $\hat{\theta}$ . We note that in the linear moment case, such a separate proof of consistency was not required and a single step proof of asymptotic normality was feasible due to linearity. In the non-linear case, as is typical for moment based estimators, we first need to show that the estimate will eventually lie in a small ball around  $\theta_0$ , and then argue normality. This is what the consistency lemma achieves.

**Lemma 10** (Consistency). *Assume that*

1. The parameter space  $\Theta \subset \mathbb{R}^p$  for target parameter  $\theta$  is compact.
2.  $\theta_0$  is the unique solution of  $\theta$  to the equation  $M(\theta, g_0) = 0$ .
3. The moment function  $m(z; \theta, g)$  is uniformly continuous in  $\theta$  over all  $\Theta$  and a sufficiently small  $\ell_2$  ball  $B_2(g_0) \subseteq \mathcal{G}$  around  $g_0$ . That is,  $\forall \epsilon > 0, \exists \delta > 0$  such that for any  $\tilde{\theta}_1, \tilde{\theta}_2 \in \Theta$  with  $\|\tilde{\theta}_1 - \tilde{\theta}_2\|_2 < \delta, \forall g \in B_2(g_0), \forall z$ , we have

$$\|m(z; \tilde{\theta}_1, g) - m(z; \tilde{\theta}_2, g)\|_2 < \epsilon.$$

4. The moment function  $m(Z; \theta, g)$  is mean-squared-continuous in  $g$ , uniformly in  $\theta$ , i.e.  $\exists L > 0$  and  $q > 0$  such that:

$$\max_{\theta \in \Theta} \|m(Z; \theta, g_1) - m(Z; \theta, g_2)\|_{2,2} \leq L \cdot \|g_1(Z) - g_2(Z)\|_{2,2}^q.$$

5. Estimator  $\hat{g}$  of the nuisance function is consistent: as  $n \rightarrow \infty$

$$\|\hat{g}(Z) - g_0(Z)\|_{2,2} = o(1).$$

6. The moment function  $m$  and estimator  $\hat{g}$  satisfies the following  $o(1)$  leave-one-out stability condition:

$$\max_{\theta \in \Theta} \|m(Z_1; \theta, \hat{g}) - m(Z_1; \theta, \hat{g}^{(-1)})\|_{2,2} = o(1)$$

as  $n \rightarrow \infty$ .

Then any estimator  $\hat{\theta}$  that satisfies that  $M_n(\hat{\theta}, \hat{g}) = o_p(1)$ , also satisfies that  $\hat{\theta} \xrightarrow{P} \theta_0$ .

*Proof.* Fix any  $\epsilon > 0$ . Since  $m(z; \theta, g)$  is uniformly continuous in  $\theta \in \Theta$  for a sufficiently small  $\ell_2$ -ball  $B_2(g_0)$  around  $g_0$ , we have that,  $\exists \delta > 0$  such that for any  $\tilde{\theta}_1, \tilde{\theta}_2 \in \Theta$  with  $\|\tilde{\theta}_1 - \tilde{\theta}_2\|_2 < \delta, \forall g \in B_2(g_0), \forall z$ , we have

$$\|m(z; \tilde{\theta}_1, g) - m(z; \tilde{\theta}_2, g)\|_2 < \epsilon/6.$$

Then

$$\|M(\tilde{\theta}_1, g) - M(\tilde{\theta}_2, g)\|_2 \leq \mathbb{E} \left[ \|m(Z; \tilde{\theta}_1, g) - m(Z; \tilde{\theta}_2, g)\|_{v,2} \right] \leq \epsilon/6.$$

(that is,  $M(\cdot, g_0)$  is uniformly continuous) and

$$\|M_n(\tilde{\theta}_1, g) - M_n(\tilde{\theta}_2, g)\|_{v,2} \leq \frac{1}{n} \sum_{i=1}^n \|m(Z_i; \tilde{\theta}_1, g) - m(Z_i; \tilde{\theta}_2, g)\|_{v,2} \leq \epsilon/6.$$

Since the parameter space  $\Theta$  is compact, there exist  $\theta_j, j = 1, \dots, J$  such that

$$\Theta \subset \cup_{j=1}^J \mathcal{B}(\theta_j, \delta).$$

By Law of Large Numbers, we have  $\forall j$ , as  $n \rightarrow \infty$

$$M_n(\theta_j, g_0) - M(\theta_j, g_0) \xrightarrow{P} 0.$$

Hence,  $\forall \eta > 0$ , for every  $j$  there exists  $n_j$  such that  $\forall n > n_j$

$$\mathbb{P} \left( \|M_n(\theta_j, g_0) - M(\theta_j, g_0)\|_{v,2} > \frac{\epsilon}{3} \right) < \frac{\eta}{3J}.$$

Then  $\forall n > \max_j n_j$ , we have

$$\mathbb{P} \left( \max_j \|M_n(\theta_j, g_0) - M(\theta_j, g_0)\|_{v,2} > \frac{\epsilon}{3} \right) < \frac{\eta}{3}.$$

Moreover, for any  $j \in J$ , we have that:

$$\begin{aligned}
& \|M_n(\theta_j, \hat{g}) - M_n(\theta_j, g_0)\|_{2,2} \\
& \leq \max_{\theta} \|M_n(\theta, \hat{g}) - M_n(\theta, g_0)\|_{2,2} \\
& = \max_{\theta} \left\| \frac{1}{n} \sum_{i=1}^n \{m(Z_i; \theta, \hat{g}) - m(Z_i; \theta, g_0)\} \right\|_{2,2} \\
& \leq \frac{1}{n} \sum_{i=1}^n \max_{\theta} \|m(Z_i; \theta, \hat{g}) - m(Z_i; \theta, g_0)\|_{2,2} \quad (\text{triangle inequality}) \\
& = \max_{\theta} \|m(Z_1; \theta, \hat{g}) - m(Z_1; \theta, g_0)\|_{2,2} \quad (\text{symmetry of estimator}) \\
& \leq \max_{\theta} \|m(Z_1; \theta, \hat{g}) - m(Z_1; \theta, \hat{g}^{(-1)})\|_{2,2} + \max_{\theta} \|m(Z_1; \theta, \hat{g}^{(-1)}) - m(Z_1; \theta, g_0)\|_{2,2} \\
& \leq \max_{\theta} \|m(Z_1; \theta, \hat{g}) - m(Z_1; \theta, \hat{g}^{(-1)})\|_{2,2} + \max_{\theta} \|m(Z; \theta, \hat{g}^{(-1)}) - m(Z; \theta, g_0)\|_{2,2} \\
& \leq \max_{\theta} \|m(Z_1; \theta, \hat{g}) - m(Z_1; \theta, \hat{g}^{(-1)})\|_{2,2} + L \cdot \|\hat{g}^{(-1)}(Z) - g_0(Z)\|_{2,2}^q \\
& = o(1).
\end{aligned}$$

Thus we have that  $M_n(\theta_j, \hat{g}) - M_n(\theta_j, g_0) = o_p(1)$ . Which means that  $\forall \eta > 0$ , there exists  $n_j$  such that for every  $n > n_j$ :

$$\mathbb{P} \left( \|M_n(\theta_j, \hat{g}) - M_n(\theta_j, g_0)\|_{v,2} > \frac{\epsilon}{3} \right) < \frac{\eta}{3J}.$$

Then  $\forall n > \max_{j \in J} n_j$ :

$$\mathbb{P} \left( \max_{j \in [J]} \|M_n(\theta_j, \hat{g}) - M_n(\theta_j, g_0)\|_{v,2} > \frac{\epsilon}{3} \right) < \frac{\eta}{3}.$$

Now  $\forall \theta \in \Theta$ , since  $\Theta \subset \cup_{j=1}^J \mathcal{B}(\theta_j, \delta)$ , there exists  $k \in \{1, \dots, J\}$  such that  $\|\theta - \theta_k\|_2 < \delta$ . Then for  $n$  sufficiently large, such that  $\hat{g} \in B_2(g_0)$ :

$$\begin{aligned}
& \|M_n(\theta, \hat{g}) - M(\theta, g_0)\|_{v,2} \\
& \leq \|M_n(\theta_k, \hat{g}) - M(\theta_k, g_0)\|_{v,2} + \|M_n(\theta, \hat{g}) - M_n(\theta_k, \hat{g})\|_{v,2} + \|M(\theta, g_0) - M(\theta_k, g_0)\|_{v,2} \\
& \leq \max_j \|M_n(\theta_j, \hat{g}) - M(\theta_j, g_0)\|_{v,2} + 2\epsilon/6.
\end{aligned}$$

Hence, we obtain

$$\mathbb{P} \left( \max_{\theta} \|M_n(\theta, \hat{g}) - M(\theta, g_0)\|_{v,2} > \epsilon \right) \leq \mathbb{P} \left( \max_j \|M_n(\theta_j, \hat{g}) - M(\theta_j, g_0)\|_{v,2} > \frac{2\epsilon}{3} \right).$$

Moreover, note that by the triangle inequality:

$$\begin{aligned}
& \max_j \|M_n(\theta_j, \hat{g}) - M(\theta_j, g_0)\|_{v,2} \\
& \leq \max_j \|M_n(\theta_j, \hat{g}) - M_n(\theta_j, g_0)\|_{v,2} + \max_j \|M_n(\theta_j, g_0) - M(\theta_j, g_0)\|_{v,2}.
\end{aligned}$$

Thus:

$$\begin{aligned}
& \mathbb{P} \left( \max_j \|M_n(\theta_j, \hat{g}) - M(\theta_j, g_0)\|_{v,2} > \frac{2\epsilon}{3} \right) \\
& \leq \mathbb{P} \left( \max_j \|M_n(\theta_j, \hat{g}) - M_n(\theta_j, g_0)\|_{v,2} > \frac{\epsilon}{3} \right) + \mathbb{P} \left( \max_j \|M_n(\theta_j, g_0) - M(\theta_j, g_0)\|_{v,2} > \frac{\epsilon}{3} \right) \\
& \leq \frac{2\eta}{3} \leq \eta.
\end{aligned}$$

And we conclude that:

$$\mathbb{P} \left( \max_{\theta} \|M_n(\theta, \hat{g}) - M(\theta, g_0)\|_{v,2} > \epsilon \right) \leq \eta.$$

This shows that

$$\max_{\theta \in \Theta} \|M_n(\theta, \hat{g}) - M(\theta, g_0)\|_{v,2} \xrightarrow{p} 0$$

as  $n \rightarrow \infty$ .

In particular, this implies that

$$\|M_n(\hat{\theta}, \hat{g}) - M(\hat{\theta}, g_0)\|_{v,2} \xrightarrow{p} 0$$

as  $n \rightarrow \infty$ .

Hence, by triangle inequality and the fact that  $M_n(\hat{\theta}, \hat{g}) = o_p(1)$ , we obtain

$$\|M(\hat{\theta}, g_0)\|_{v,2} \leq \|M_n(\hat{\theta}, \hat{g})\|_{v,2} + \|M_n(\hat{\theta}, \hat{g}) - M(\hat{\theta}, g_0)\|_{v,2} = o_p(1).$$

Hence,  $M(\hat{\theta}, g_0) = o_p(1)$ .

It remains to show that

$$\hat{\theta} \xrightarrow{p} \theta_0$$

as  $n \rightarrow \infty$ .

To achieve this, again fix any  $\epsilon > 0$ . Then since  $\Theta$  is compact,  $B(\theta_0, \epsilon)^c$  is also compact as a closed subset of  $\Theta$ . By continuity of  $\theta \mapsto \|M(\theta, g_0)\|_2$  and the fact that  $\theta_0$  is the unique solution to  $M(\theta_0, g_0) = 0$ , we must have that  $\|M(\theta, g_0)\|_{v,2}$  is bounded away from zero on  $B(\theta_0, \epsilon)^c$ . That is,  $\exists \eta > 0$  such that for any  $\theta$  with  $\|\theta - \theta_0\|_{v,2} \geq \epsilon$ ,

$$\|M(\theta, g_0)\|_{v,2} > \eta.$$

Then since  $M(\hat{\theta}, g_0) = o_p(1)$ , there exists  $N \in \mathbb{N}$  such that  $\forall n > N$

$$\mathbb{P} \left( \|M(\hat{\theta}, g_0)\|_{v,2} > \eta \right) < \epsilon.$$

Then  $\forall n > N$

$$\mathbb{P} \left( \|\hat{\theta} - \theta_0\|_{v,2} \geq \epsilon \right) \leq \mathbb{P} \left( \|M(\hat{\theta}, g_0)\|_{v,2} > \eta \right) < \epsilon.$$

This establishes consistency of  $\hat{\theta}$ . □

Now we extend Theorem 1 to nonlinear moments.

**Theorem 11.** Let  $A(\theta, g) := \partial_\theta M(\theta, g)$  denote the Jacobian of the moment vector, with respect to  $\theta$  and  $H_i(\theta, g) := \partial_\theta^2 M_i(\theta, g)$  denote the Hessian of the  $i$ -th moment coordinate. Suppose that the moment  $m$  is twice differentiable with  $a(z; \theta, g) := \partial_\theta m(z; \theta, g)$  and  $h_i(z; \theta, g) := \partial_\theta^2 m_i(z; \theta, g)$ . Let  $A_n(\theta, g) := \frac{1}{n} \sum_{i=1}^n a(Z_i; \theta, g)$  and  $H_{i,n} := \frac{1}{n} \sum_{i=1}^n h_i(Z_i; \theta, g)$  denote the empirical counterparts of  $A, H_i$ .

Suppose that the nuisance estimate  $\hat{g} \in \mathcal{G}$  satisfies:

$$\|\hat{g} - g_0\|_2^2 \triangleq \mathbb{E}_X [\|\hat{g}(X) - g_0(X)\|_2^2] = o_p \left( n^{-1/2} \right). \quad (\text{Consistency Rate})$$

Suppose that the moment satisfies the Neyman orthogonality condition: for all  $g \in \mathcal{G}$

$$D_g M(\theta_0, g_0)[g - g_0] \triangleq \frac{\partial}{\partial t} M(\theta_0, g_0 + t(g - g_0)) \Big|_{t=0} = 0 \quad (\text{Neyman Orthogonality})$$

and a second-order smoothness condition: for all  $g \in \mathcal{G}$

$$D_{gg} M(\theta_0, g_0)[g - g_0] \triangleq \frac{\partial^2}{\partial t^2} M(\theta_0, g_0 + t(g - g_0)) \Big|_{t=0} = O(\|g - g_0\|_2^2) \quad (\text{Smoothness})$$

Assume that  $A(\theta_0, g_0)^{-1}$  exists and that for any  $g, g' \in \mathcal{G}$ :

$$\|A(\theta_0, g) - A(\theta_0, g')\|_{op} = O(\|g - g'\|_2). \quad (\text{Lipschitz})$$

Suppose that the moment  $m$  and estimator  $\hat{g}$  satisfy the stochastic equicontinuity conditions:

$$\begin{aligned} \|A(\theta_0, \hat{g}) - A(\theta_0, g_0) - (A_n(\theta_0, \hat{g}) - A_n(\theta_0, g_0))\|_{op} &= o_p(1) \\ \sqrt{n} \|M(\theta_0, \hat{g}) - M(\theta_0, g_0) - (M_n(\theta_0, \hat{g}) - M_n(\theta_0, g_0))\|_{2,2} &= o_p(1) \end{aligned} \quad (\text{NonLin. Stoc. Equi.})$$

Suppose that the conditions in Lemma 10 are true. Moreover, assume that for any  $i, j \in [p] \times [p]$ , the random variable  $a_{i,j}(Z; \theta_0, g_0)$  has bounded variance and that  $\|\theta_0\|_2 = O(1)$ . Suppose that  $\exists$  open neighborhood  $W$  of  $g_0$  such that

$$\sup_{\theta \in \Theta, g \in W, i \in [p]} \|H_i(\theta, g)\|_{op}, \|H_{i,n}(\theta, g)\|_{op} < \infty \quad (\text{Bounded Hessian})$$

Let  $\hat{\theta}$  denote any approximate solution to the plug-in empirical moment equation that satisfies  $M_n(\hat{\theta}, \hat{g}) = o_p(n^{-1/2})$ . Then  $\hat{\theta}$  is asymptotically normal:

$$\sqrt{n} (\hat{\theta} - \theta_0) \xrightarrow{n \rightarrow \infty, d} N(0, A(\theta_0, g_0)^{-1} \mathbb{E} [m(Z; \theta_0, g_0) m(Z; \theta_0, g_0)^\top] A(\theta_0, g_0)^{-1}).$$

*Proof.* Let  $A_i(\theta, g)$  denote the  $i$ -th column of the Jacobian matrix. By Taylor's expansion, we have  $\forall g$  and  $i \in [p]$

$$M_i(\hat{\theta}, g) - M_i(\theta_0, g) = A_i(\theta_0, g)'(\hat{\theta} - \theta_0) + (\hat{\theta} - \theta_0)' H_i(\tilde{\theta}_i, g)(\hat{\theta} - \theta_0)$$

for some  $\tilde{\theta}_i$  between  $\hat{\theta}$  and  $\theta_0$ .

By Lemma 10, we know that

$$\|\hat{\theta} - \theta_0\|_2 = o_p(1).$$

Further, by the bounded Hessian condition and consistency of  $\hat{\theta}$ , we know that uniformly for  $g \in W$

$$(\hat{\theta} - \theta_0)' H_i(\tilde{\theta}_i, g)(\hat{\theta} - \theta_0) = O_p(\|\hat{\theta} - \theta_0\|_2^2) = o_p(\|\hat{\theta} - \theta_0\|_2).$$

Moreover, for any  $g$  with  $\|g - g_0\|_2 = o_p(1)$  we have

$$\begin{aligned} A(\theta_0, g) \cdot (\hat{\theta} - \theta_0) &= A(\theta_0, g_0) \cdot (\hat{\theta} - \theta_0) + (A(\theta_0, g) - A(\theta_0, g_0)) \cdot (\hat{\theta} - \theta_0) \\ &= A(\theta_0, g_0) \cdot (\hat{\theta} - \theta_0) + O(\|g - g_0\|_2 \|\hat{\theta} - \theta_0\|_2) \\ &= A(\theta_0, g_0) \cdot (\hat{\theta} - \theta_0) + o_p(\|\hat{\theta} - \theta_0\|_2), \end{aligned}$$

where the second to last equality uses the Lipschitz condition.

By consistency, we have  $\|\hat{g} - g_0\|_2 = o_p(1)$  and that  $\hat{g} \in W$  for  $n$  large enough.

Hence, we obtain that for large enough  $n$ ,

$$\begin{aligned} A(\theta_0, g_0) \cdot (\hat{\theta} - \theta_0) &= M(\hat{\theta}, \hat{g}) - M(\theta_0, \hat{g}) + o_p(\|\hat{\theta} - \theta_0\|_2) \\ &= M(\hat{\theta}, \hat{g}) - M_n(\hat{\theta}, \hat{g}) + M(\theta_0, g_0) - M(\theta_0, \hat{g}) + M_n(\hat{\theta}, \hat{g}) + o_p(\|\hat{\theta} - \theta_0\|_2) \\ &= M(\hat{\theta}, \hat{g}) - M_n(\hat{\theta}, \hat{g}) + M(\theta_0, g_0) - M(\theta_0, \hat{g}) + o_p(n^{-1/2} + \|\hat{\theta} - \theta_0\|_2), \end{aligned}$$

where the last line follows because by definition  $M_n(\hat{\theta}, \hat{g}) = o_p(n^{-1/2})$ .

By Neyman orthogonality and the boundness condition on the second derivative of  $M$  with respect to  $g$ , for any  $g$  we have

$$M(\theta_0, g_0) - M(\theta_0, g) = D_g M(\theta_0, g_0)[g_0 - g] + O(\|g - g_0\|_2^2) = O(\|g - g_0\|_2^2).$$

Plugging in  $g = \hat{g}$ , noting that  $\|g - g_0\|_2^2 = o_p(n^{-1/2})$  we obtain

$$M(\theta_0, g_0) - M(\theta_0, \hat{g}) = o_p(n^{-1/2}).$$

Let  $G_n(\theta, g) := M(\theta, g) - M_n(\theta, g)$ . Thus we have that

$$A(\theta_0, g_0) \cdot (\hat{\theta} - \theta_0) = G_n(\hat{\theta}, \hat{g}) + o_p(n^{-1/2} + \|\hat{\theta} - \theta_0\|_2).$$

We decompose  $G_n(\hat{\theta}, \hat{g})$  into the following sum:

$$G_n(\hat{\theta}, \hat{g}) = G_n(\hat{\theta}, \hat{g}) - G_n(\theta_0, \hat{g}) + (G_n(\theta_0, \hat{g}) - G_n(\theta_0, g_0)) + G_n(\theta_0, g_0).$$

By Taylor's expansion, we have

$$\begin{aligned} G_n(\hat{\theta}, \hat{g}) - G_n(\theta_0, \hat{g}) &= M(\hat{\theta}, \hat{g}) - M(\theta_0, \hat{g}) - (M_n(\hat{\theta}, \hat{g}) - M_n(\theta_0, \hat{g})) \\ &= (A(\theta_0, \hat{g}) - A_n(\theta_0, \hat{g}))' (\hat{\theta} - \theta_0) + o_p(\|\hat{\theta} - \theta_0\|_2) \end{aligned}$$

Now

$$\begin{aligned} &\|A(\theta_0, \hat{g}) - A_n(\theta_0, \hat{g})\|_{op} \\ &\leq \|A(\theta_0, g_0) - A_n(\theta_0, g_0)\|_{op} + \|A(\theta_0, \hat{g}) - A(\theta_0, g_0) - (A_n(\theta_0, \hat{g}) - A_n(\theta_0, g_0))\|_{op} \\ &= \|A(\theta_0, g_0) - A_n(\theta_0, g_0)\|_{op} + o_p(1), \end{aligned}$$

where the last equality follows from the stochastic equicontinuity condition on the Jacobian. Since  $A(\theta_0, g_0) - A_n(\theta_0, g_0)$  is a mean zero empirical process with  $\partial_\theta m(Z; \theta_0, g_0)$  having bounded variance, we have

$$\|A(\theta_0, g_0) - A_n(\theta_0, g_0)\|_{op} = o_p(1).$$

Hence,

$$G_n(\hat{\theta}, \hat{g}) - G_n(\theta_0, \hat{g}) = o_p(\|\hat{\theta} - \theta_0\|_2).$$

Moreover,

$$G_n(\theta_0, \hat{g}) - G_n(\theta_0, g_0) = M(\theta_0, \hat{g}) - M_n(\theta_0, \hat{g}) - (M(\theta_0, g_0) - M_n(\theta_0, g_0)) = o_p(n^{-1/2})$$

by stochastic equicontinuity.

In summary, we have

$$G_n(\hat{\theta}, \hat{g}) = G_n(\theta_0, g_0) + o_p(\|\hat{\theta} - \theta_0\|_2 + n^{-1/2}),$$

and thus

$$A(\theta_0, g_0) \cdot (\hat{\theta} - \theta_0) = G_n(\theta_0, g_0) + o_p(\|\hat{\theta} - \theta_0\|_2 + n^{-1/2}).$$

That is, we have

$$(\hat{\theta} - \theta_0) = A(\theta_0, g_0)^{-1} G_n(\theta_0, g_0) + o_p(\|\hat{\theta} - \theta_0\|_2 + n^{-1/2}).$$

Since  $G_n(\theta_0, g_0)$  is a mean-zero empirical process, we have that  $\|G_n(\theta_0, g_0)\|_2 = O_p(n^{-1/2})$ .

By consistency of  $\hat{\theta}$ , above implies that

$$\hat{\theta} - \theta_0 = O_p(n^{-1/2}).$$

Thus we get

$$(\hat{\theta} - \theta_0) = A(\theta_0, g_0)^{-1} G_n(\theta_0, g_0) + o_p(n^{-1/2}).$$

By Slutsky's Theorem, we conclude that

$$\sqrt{n}(\hat{\theta} - \theta_0) \xrightarrow{d} N(0, A(\theta_0, g_0)^{-1} \mathbb{E}[m(Z; \theta_0, g_0)m(Z; \theta_0, g_0)'] A(\theta_0, g_0)^{-1}).$$

□

We can also directly extend Lemma 2 to general nonlinear moments.



**Lemma 12** (Non-Linear Main Lemma). *If the estimation algorithm satisfies the stability conditions: for all  $i, j \in [p]$*

$$\begin{aligned} \max_{l \in [n]} \left\| a_{i,j}(Z_l; \theta_0, \hat{g}) - a_{i,j}(Z_l; \theta_0, \hat{g}^{(-l)}) \right\|_1 &= o(n^{-1/2}) \\ \max_{l \in [n]} \left\| a_{i,j}(Z; \theta_0, \hat{g}) - a_{i,j}(Z; \theta_0, \hat{g}^{(-l)}) \right\|_2 &= o(n^{-1/2}) \\ \max_{l \in [n]} \left\| m_i(Z_l; \theta_0, \hat{g}) - m_i(Z_l; \theta_0, \hat{g}^{(-l)}) \right\|_1 &= o(n^{-1/2}) \\ \max_{l \in [n]} \left\| m_i(Z; \theta_0, \hat{g}) - m_i(Z; \theta_0, \hat{g}^{(-l)}) \right\|_2 &= o(n^{-1/2}) \end{aligned}$$

and the moment satisfies the mean-squared-continuity condition:

$$\begin{aligned} \forall g, g' : \mathbb{E}[(a_{i,j}(Z; \theta_0, g) - a_{i,j}(Z; \theta_0, g'))^2] &\leq L \|g - g'\|_2^q \\ \forall g, g' : \mathbb{E}[(m_i(Z; \theta_0, g) - m_i(Z; \theta_0, g'))^2] &\leq L \|g - g'\|_2^q \end{aligned}$$

for some  $0 < q < \infty$  and some  $L > 0$ , then the Condition **(NonLin. Stoc. Equi.)** is satisfied.

*Proof.* The proof follows by replacing all functions  $a(z, g), \nu(z, g)$  in the proof of Lemma 2 correspondingly with the functions  $a(z; \theta_0, g)$  and  $m(z; \theta_0, g)$ .  $\square$

**Application to bagging estimators.** We finally note that if the moment satisfies Lipschitz conditions of the form:

$$\begin{aligned} \mathbb{E} \left[ \left( a_{i,j}(Z_l; \theta_0, \hat{g}) - a_{i,j}(Z_l; \theta_0, \hat{g}^{(-l)}) \right)^2 \right] &\leq L \cdot \mathbb{E} \left[ \sup_z \|\hat{g}(z) - \hat{g}^{(-l)}(z)\|_2^{2r} \right]^{1/r} \\ \max_{\theta \in \Theta} \mathbb{E} \left[ \left( m_i(Z_l; \theta, \hat{g}) - m_i(Z_l; \theta, \hat{g}^{(-l)}) \right)^2 \right] &\leq L \cdot \mathbb{E} \left[ \sup_z \|\hat{g}(z) - \hat{g}^{(-l)}(z)\|_2^{2r} \right]^{1/r} \end{aligned}$$

Then Theorem 5 can be applied to upper bound the right hand side of these inequalities by  $o_p(n^{-1/2})$  for bagging estimators. This would then imply the stability conditions invoked in both the consistency and the normality theorem. Thus the main application for bagging estimators carries over to non-linear moments.
